1 **An Out-of-Patagonia dispersal explains most of the worldwide genetic distribution in**  
2 ***Saccharomyces eubayanus***

3 Roberto F. Nespolo<sup>1,2,3</sup>, Carlos A. Villarroel<sup>2,4</sup>, Christian I. Oporto<sup>2,4</sup>, Sebastián M. Tapia<sup>2</sup>,  
4 Franco Vega<sup>2,4</sup>, Kamila Urbina<sup>2,4</sup>, Matteo De Chiara<sup>5</sup>, Simone Mozzachiodi<sup>5</sup>, Ekaterina  
5 Mikhalev<sup>6</sup>, Dawn Thompson<sup>6</sup>, Pablo Saenz-Agudelo<sup>1</sup>, Gianni Liti<sup>5</sup> and Francisco A.  
6 Cubillos<sup>2,4\*</sup>.

7

8 <sup>1</sup>Instituto de Ciencias Ambientales y Evolutivas, Universidad Austral de Chile, Valdivia,  
9 5090000, Chile.

10 <sup>2</sup>Millennium Institute for Integrative Biology (iBio)

11 <sup>3</sup>Center of Applied Ecology and Sustainability (CAPES), Santiago, Chile.

12 <sup>4</sup>Universidad de Santiago de Chile, Facultad de Química y Biología, Departamento de  
13 Biología, Santiago, Chile.

14 <sup>5</sup>Université Côte d'Azur, CNRS, INSERM, IRCAN, Nice, France

15 <sup>6</sup>Ginkgo Bioworks, Boston, MA 02210, USA.

16 Keywords: *S. eubayanus*, yeast, beer, genome, sequencing

17 Running title: Population genetics in *S. eubayanus* from Patagonia

18

19 \*Corresponding Author: Francisco A. Cubillos

20 Correspondence should be addressed to: [francisco.cubillos.r@usach.cl](mailto:francisco.cubillos.r@usach.cl)

21

22

23

24

25 **ABSTRACT**

26 *Saccharomyces eubayanus* represents missing cryotolerant ancestor of lager yeast hybrid  
27 and can be found in Patagonia in association with *Nothofagus* forests. The limited number  
28 of isolates and associated genomes available has prevented to resolve the *S. eubayanus*  
29 origin and evolution. Here, we present a sampling effort at an unprecedented scale and  
30 report the isolation of 160 strains from ten sampling sites along 2,000 km distance in South  
31 America. We sequenced the genome of 82 strains and, together with other 25 available  
32 genomes, performed comprehensive phylogenetic analysis. Our results revealed the  
33 presence of three main Patagonia-B lineages together with dozens of admixed strains  
34 distributed in three mosaic clusters. The PB-1 lineage isolated from Tierra del Fuego  
35 exhibited the highest genetic diversity, lowest LD blocks and highest  $F_{IS}$  values compared  
36 to the other lineages, suggesting a successful adaptation to cold temperatures in extreme  
37 environments and greater inbreeding rates in Tierra del Fuego. Differences between  
38 lineages and strains were found in terms of aneuploidy and pangenome content, evidencing  
39 a lateral gene transfer event in PB-2 strains from an unknown donor species. Overall, the  
40 Patagonian lineages, particularly southern populations, showed a greater global genetic  
41 diversity compared to Holarctic and Chinese lineages, supporting the scenario of a *S.*  
42 *eubayanus* colonization from Patagonia and then spread towards northern and western  
43 regions, including the Holarctic (North America and China) and New Zealand. Interestingly,  
44 fermentative capacity and maltose consumption resulted negatively correlated with latitude,  
45 indicating a better fermentative performance in norther populations. Our genome analysis  
46 together with previous reports in the sister species *S. uvarum* strongly suggests that the *S.*  
47 *eubayanus* ancestor could have originated in Patagonia or the Southern Hemisphere, rather  
48 than China, yet further studies are needed to resolve this conflicting scenario. Understanding  
49 *S. eubayanus* evolutionary history is crucial to resolve the unknown origin of the lager yeast  
50 and might open new avenues for biotechnological applications.

## 51 INTRODUCTION

52 There are at least 1,500 species of yeasts, which can be found on a broad range of  
53 substrates including fruit skin, cacti exudates and soil, where they can be either inert or  
54 pathogenic (Guz 2011). Some species from the Saccharomycotina subphylum have  
55 developed the ability to ferment simple sugars from fruits to produce alcohol. In this way,  
56 fermentation became a key innovation that led to the diversification of fermentative yeasts  
57 about 100 million years ago (MYA), coinciding with the appearance of Angiosperms (Piskur  
58 et al. 2006; Dashko et al. 2014). The monophyletic *Saccharomyces* genus is currently  
59 composed of eight distinct species (Dujon and Louis 2017), including the partially  
60 domesticated *S. cerevisiae* and other non-domesticated species, such as *S. eubayanus*  
61 (Borneman and Pretorius 2015). This clade contains some of the most important species  
62 involved in alcohol and bread fermentation, likely due to their ability to grow in the absence  
63 of oxygen (anaerobic fermentation)(Hagman et al. 2013). Given the economic importance  
64 of this clade, as well as the wealth of genomic information that has been produced in the  
65 past decade, particularly for the model organism *S. cerevisiae* (Liti et al. 2009; Schacherer  
66 et al. 2009; Gallone et al. 2016; Goncalves et al. 2016; Legras et al. 2018; Peter et al. 2018),  
67 natural populations of *Saccharomyces* are excellent models for understanding genome  
68 evolution and adaptation in the wild.

69 *S. cerevisiae* was the first sequenced eukaryote, and recently the large amount of isolates  
70 in this species and associated genomic data provide exceptional new insights into the  
71 genomic processes that drive environmental adaptation and genome evolution between  
72 isolates (Yue et al. 2017; Legras et al. 2018; Peter et al. 2018). Given the feasibility to rapidly  
73 and cost-effectively sequence full genomes, other *Saccharomyces* genomes have been fully  
74 obtained (Dujon and Louis 2017). *Saccharomyces* species harbour different genetic  
75 structures, population histories and unique phenotypic properties. Despite these advances,

76 the number of isolates for which both fully annotated genomes and phenotypic data are  
77 available is still low. In many cases, only a handful of isolates from a species have been  
78 studied and therefore the identification of genomic features responsible for local adaptation  
79 and evolutionary changes is less well documented compared to *S. cerevisiae*, limiting the  
80 understanding of adaptation processes in the genus.

81 In nature, several *Saccharomyces* inter-species hybrids have been found. An example of  
82 this includes the workhorse of the modern brewing industry, *S. pastorianus*, a hybrid  
83 between *S. cerevisiae* and the cold-tolerant *S. eubayanus* (Baker et al. 2015; Krogerus et  
84 al. 2017). Despite the industrial importance of *S. pastorianus*, much of the natural history of  
85 this hybrid remains obscure, largely because the *S. eubayanus* parental strain was only  
86 recently isolated (Libkind et al. 2011). The combination of precise alleles gives the hybrid *S.*  
87 *pastorianus* a series of competitive advantages in the fermentative environment. For  
88 example, efficient maltotriose utilization was inherited from *S. cerevisiae*, while fermentation  
89 at low temperatures and maltose utilization is the legacy of the cryotolerant *S. eubayanus*  
90 (Hebly et al. 2015; Krogerus et al. 2017; Brickwedde et al. 2018; Eizaguirre et al. 2018;  
91 Baker et al. 2019). Providing a unique fermentation profile for brewing, *S. eubayanus* can  
92 efficiently grow at a lower range of temperatures (4°C – 25°C) compared to *S. cerevisiae*,  
93 however the genetic basis of this advantage is yet unknown (Baker et al. 2015). *S.*  
94 *eubayanus* was originally isolated from *Nothofagus* trees in the Argentinian Patagonia  
95 (Libkind et al. 2011) and since then it has been isolated in New Zealand (Gayevskiy and  
96 Goddard 2016), North America (Peris et al. 2014) and East Asia (Bing et al. 2014). However,  
97 the evolutionary origin of *S. eubayanus* is still controversial. While this species has been  
98 isolated from South American *Nothofagus* trees recurrently (Eizaguirre et al. 2018) and only  
99 a handful of isolates have been recovered from trees in China and North America (Bing et  
100 al. 2014; Peris et al. 2016), a subset of the strains from China have been reported as the

101 earliest diverging lineage, suggesting an Asian origin of the species (Bing et al. 2014),  
102 although these findings have been challenged (Eizaguirre et al. 2018).

103 Molecular profiling indicates that *S. eubayanus* is composed of three populations, besides  
104 the early diverging lineage of West China. These populations include a 'Holarctic' cluster (a  
105 group of related strains from Tibet and North America) and two Patagonian populations  
106 denominated: 'Patagonia A' and 'Patagonia B' (Peris et al. 2016). The populations, can be  
107 further divided into six subpopulations, denominated: PB-1, PB-2, PB-3, Holarctic, PA-1 &  
108 PA-2 (Peris et al. 2016; Eizaguirre et al. 2018). Whole genome sequence comparison  
109 among wild *S. eubayanus* strains indicate that, thus far, the Holarctic lineage is the closest  
110 relative of the lager yeast (Peris et al. 2016; Eizaguirre et al. 2018). Interestingly, multi-locus  
111 sequence comparisons have indicated that the nucleotide diversity of *S. eubayanus*  
112 Patagonian populations is greater than that of the West China and the Holarctic (North  
113 American) lineages, suggesting a greater colonization success in South America (Peris et  
114 al. 2016). However, until now only a handful of *S. eubayanus* genomes per population have  
115 been fully sequenced preventing a detailed population genomics portrait.

116 Here, we isolated 160 *S. eubayanus* strains from bark samples obtained from *Nothofagus*  
117 trees in Chile and we provide annotated genomes together with phenotypic characterization  
118 for 82 selected strains. We investigated the genetic structure and nucleotide diversity of this  
119 set of strains and re-analyzed other 23 previously published genomes. Overall, we provide  
120 evidence of a population structure in Patagonia that greatly expands previously known  
121 genetic structure in this region. Moreover, phenotypic clustering correlated well with genetic  
122 distances, where individuals from northern sites showed greater fermentation performance  
123 and high temperature tolerance than isolates from southern sites. The genomic data  
124 presented here broadens our knowledge of the genetics, ecology, and evolution of wild  
125 *Saccharomyces* strains.

## 126 RESULTS

### 127 *S. eubayanus* isolation and whole genome sequencing

128 In order to determine the presence and distribution of *S. eubayanus* isolates along the south  
129 western side of the Andes Mountains (which is within the Chilean territory), we sampled ten  
130 national parks and reserves between 2017 and 2018. The sites sampled correspond to  
131 primary forest spanning 2,090 km from Altos de Lircay National Park in central Chile (VII  
132 Maule Region, Chile) to Karukinka Natural Park in southern Chile (XII Magallanes Region,  
133 Chile) (**Figure 1A**). From these sites, we obtained 553 bark samples from *Nothofagus* and  
134 *Araucaria* trees, primordially *N. pumilio*, *N. antarctica*, *N. dombeyi* and *A. araucana*.  
135 Raffinose and ethanol media enrichment (Cubillos et al. 2019) allowed us to recover yeast  
136 colonies in 77% of the samples. Potential *Saccharomyces* strains were identified by  
137 sequencing the ITS and/or *GSY1* and *RPI1* RFLP (Peris et al. 2014; Peris et al. 2016). From  
138 these, 160 *S. eubayanus* strains were identified from different individual trees (**Table S1**,  
139 representing 28.9% of the samples), and in parallel, another set of 179 *S. uvarum* isolates  
140 were recovered (representing 37.9% of the samples), together with dozens of non-  
141 *Saccharomyces* species belonging to the *Lachancea*, *Kregervanrija*, *Kazachstania* and  
142 *Hanseniaspora* genera. Preliminary genotyping using *GSY1* RFLP analysis (Peris et al.  
143 2014; Peris et al. 2016) suggested that all isolates belong to the PB lineage, except for  
144 isolate CL609.1 which showed a PA restriction pattern (data not shown). In general, we  
145 observed a pattern between yeasts and hosts, where *N. pumilio* and *N. antarctica* contained  
146 mostly *S. eubayanus* strains, while all but one isolate derived from *N. dombeyi* and *A.*  
147 *araucana* samples were identified as *S. uvarum* (**Table S1**). Moreover, the frequency of  
148 yeast isolates was higher towards southern regions (from Villarrica to Torres del Paine),  
149 where up to 90% of the bark samples yielded yeast colonies, and most of these belonged  
150 to the *Saccharomyces* genus (**Figure 1B**). On the contrary, a lower fraction of yeast colonies

151 was obtained from Tierra del Fuego, likely due to the extreme environmental conditions  
 152 found in this region. Overall, our results demonstrate the high frequency of the *S. eubayanus*  
 153 species after latitude 33° in the western side of the Andes Mountains.

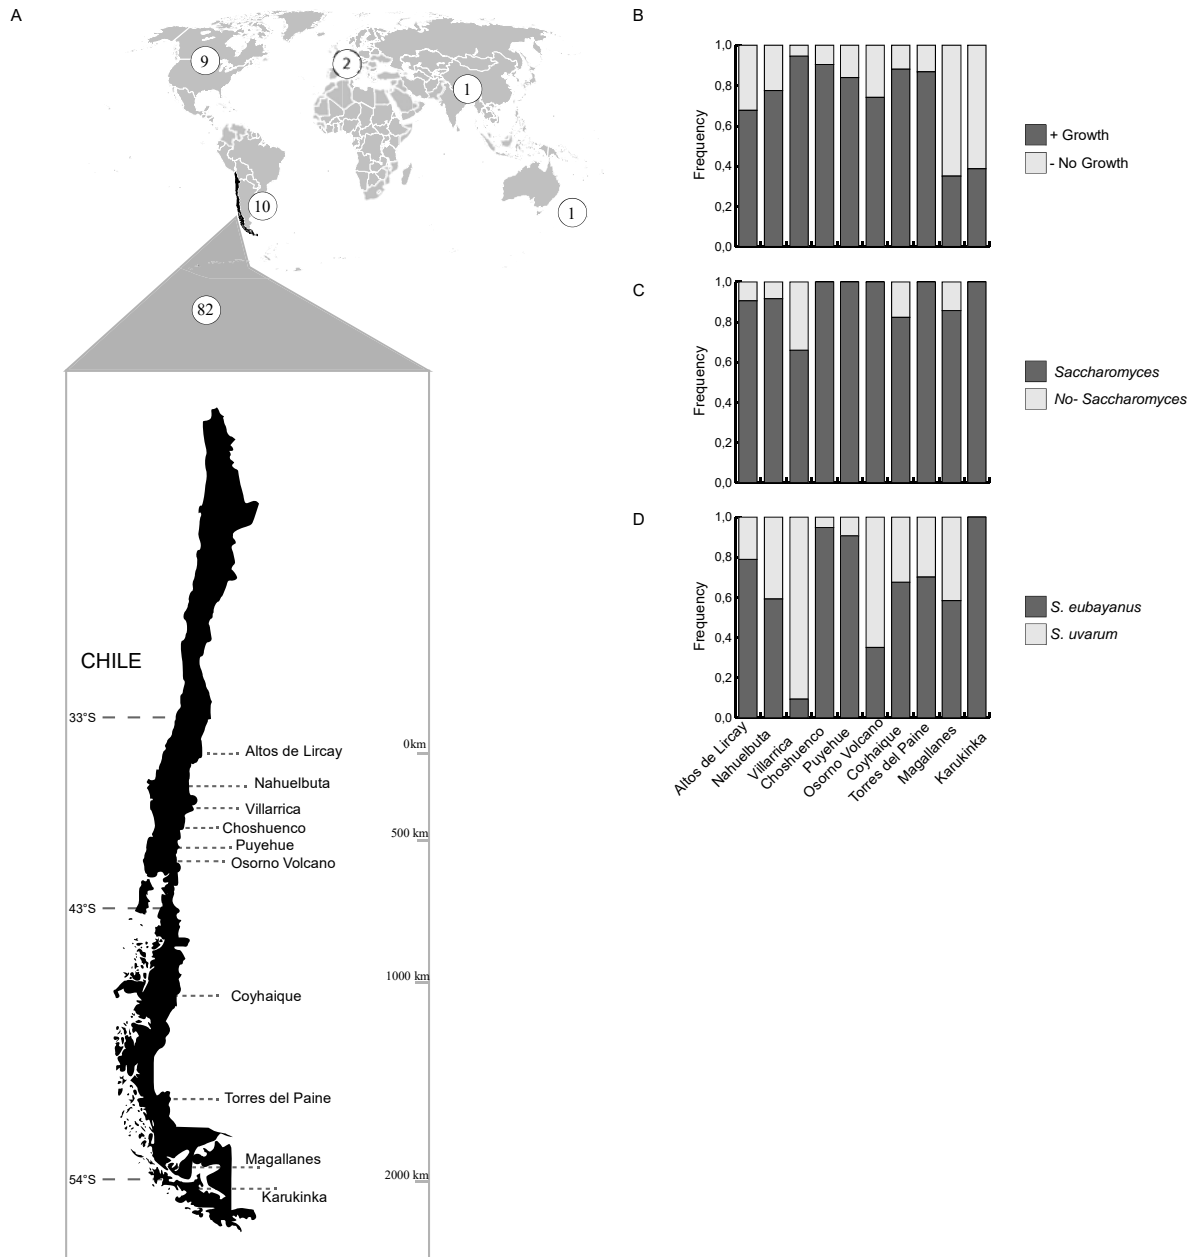

154

155 **Figure 1. Geographic distribution and isolation frequency of *S. eubayanus* strains.** (A) Map of  
 156 the world depicting the number of available *S. eubayanus* sequenced genomes from around the world  
 157 (white circles), together with the ten localities in Chile where the 82 strains sequenced in this study  
 158 were isolated. Overall, a 2,090 km distance between sites was covered. Frequency of bark samples  
 159 that yielded a (B) successful yeast isolation (dark grey) or no growth (light grey), a (C) *Saccharomyces*

160 (dark grey) or other non-*Saccharomyces* genera (light grey), and a (D) *S. eubayanus* (dark grey) or  
161 *S. uvarum* (light grey) species.

162 To investigate the genomic variation and population structure of the *S. eubayanus* isolates,  
163 we sequenced the whole genomes of 82 strains, randomly selected, from the ten sampling  
164 sites using Illumina sequencing technology. Furthermore, to explore the genomic diversity  
165 across the entire geographic range of this species, we combined our dataset with all  
166 previously published genome from 23 strains obtained from the North America (9 strains),  
167 Argentina (10 strains) (Peris et al. 2016), China (1 strain) (Bing et al. 2014), New Zealand  
168 (1 strain) (Gayevskiy and Goddard 2016) and two lager genomes (Baker et al. 2015),  
169 maximising the geographical dispersal of the species. In parallel, FACS analysis revealed  
170 that all samples were diploids, except for CL609.1 and CL1005.1 that were found as haploid  
171 and tetraploid respectively (**Figure S1**). Indeed, all strains were able to sporulate, with the  
172 exception of CL609.1 (data not-shown).

173 On average, we obtained 25.9 million reads per sample, which were aligned against the  
174 CBS12357<sup>T</sup> type strain reference genome (Brickwedde et al. 2018). From this, we obtained  
175 an average coverage of 164X, ranging from 17X to 251X (**Table S2**). A total of 229,272  
176 single nucleotide polymorphisms, together with 19,982 insertions and deletions were found  
177 across the 82 *S. eubayanus* genomes collected in this study. The number of SNPs per strain  
178 ranged from 28,420 to 76,320 with strains CL619.1 and CL609.1 representing both extremes  
179 and which were isolated from Osorno Volcano and Puyehue neighbouring isolation sites,  
180 respectively (**Table S2a**). Overall, no strain isolated in this study represents a close relative  
181 to the type strain (obtained from Argentina), suggesting that the Andes Mountains  
182 represents a natural barrier between *S. eubayanus* populations (**Table S2b**). On average,  
183 across the 82 genomes we obtained 39,024 SNPs per strain relative to the reference  
184 genome, and a SNP was found on average every ~300 bp. In parallel, we found on average  
185 1,606 insertions and 1,677 deletions per isolate relative to the type strain. These results



186 demonstrate that Chilean *S. eubayanus* populations are genetically distinct from those  
187 described in Argentina and world-wide.

### 188 ***Population structure and admixed isolates***

189 To examine whether the collected isolates comprise one panmictic population or various  
190 genetically distinct populations, we generated a neighbour joining phylogenetic tree based  
191 on 590,909 polymorphic sites (**Figure 2A**). The phylogeny obtained demonstrates that  
192 Chilean strains displayed different ancestry and mostly fell into three major clades:  
193 Patagonia B1 (PB-1), B2 (PB-2) & B3 (PB-3), each containing 31, 16, 25 strains,  
194 respectively. Nine strains fell outside the major PB lineage and might represent admixed  
195 strains ('SoAm'). Also, one strain shares a recent common ancestor with the PA cluster  
196 suggesting that this strain might be a hybrid of the PB and PA lineages (**Figure 2B**). Each  
197 clade tends to contain strains obtained from neighbouring localities, suggesting a strong  
198 influence of geography on genetic differentiation. For example, strains obtained from  
199 southern (Coyhaique, Torres del Paine, Magallanes, Karukinka) and south-central Chile  
200 (Osorno Volcano) clustered in PB-1. Strains from central Chile (Altos de Lircay, Nahuelbuta  
201 and Villarrica) clustered in PB-2, and some strains from south-central Chile also clustered  
202 in PB-3 (Villarrica, Puyehue, Choshuenco, and Osorno Volcano). Interestingly, no isolates  
203 belonging to Patagonia A were found in Chile, and only a single isolate (CL609.1 from  
204 Puyehue) clustered near the PA branch, yet outside of this lineage.

205 To investigate the ancestry, we explored population structure using STRUCTURE. For this,  
206 we selected 9,885 SNPs evenly distributed across the whole genome. Among our analyzed  
207 strains, we identified three groups exhibiting different levels of mosaic or admixed genomes.  
208 This analysis indicated an optimum  $k = 5$  groups ( $\Delta K_5 = 2,652$ , **Figure S2, Table S3**),  
209 highlighted by the presence of three main Patagonia B populations in Chile (**Figure 2B**).

210 Furthermore, sequence similarity using SNP data and principal component analysis (PCA)  
211 on the Patagonian populations validated the presence of three groups in addition to the  
212 Argentinian Patagonia A cluster (**Figure S3**). Most localities contained isolates belonging to  
213 one lineage and/or admixed groups, excepting for Villarrica and Osorno Volcano localities  
214 which harbour at least two lineages and/or admixed set of strains, representing sympatric  
215 geographic regions (**Figure 2C**). Overall, the phylogenomic, STRUCTURE and PCA  
216 analyses indicate that the *S. eubayanus* Patagonia-B clade found in Chile can be subdivided  
217 into three different lineages, PB-1, PB-2 & PB-3. Moreover, three groups of admixed strains  
218 (SoAm 1-3) were found, that together with the North American (NoAm), Holarctic and PA  
219 lineages shape the genetic structure of *S. eubayanus*.

220 In order to gain insight into the historical recombination events that affected the PB clade,  
221 we estimated linkage disequilibrium decay. Estimates of LD based on  $r^2$  values differed  
222 between the three PB lineages (**Figure 2D**). In particular, relatively low LD values were  
223 observed for all populations, but the maximum  $r^2$  and the rates of decay differed among  
224 populations. LD was detected over larger distances in the PB-3 and PB-2 populations, while  
225 LD decreased rapidly with increasing distance for the PB-1 population. Lineages showed a  
226 50% LD decay of 2.9 kb, 29.1 kb and 22.5 kb in the PB-1, PB-2 and PB-3 populations,  
227 respectively, demonstrating a population-specific LD decay and greater recombination  
228 levels in the PB-1 population.

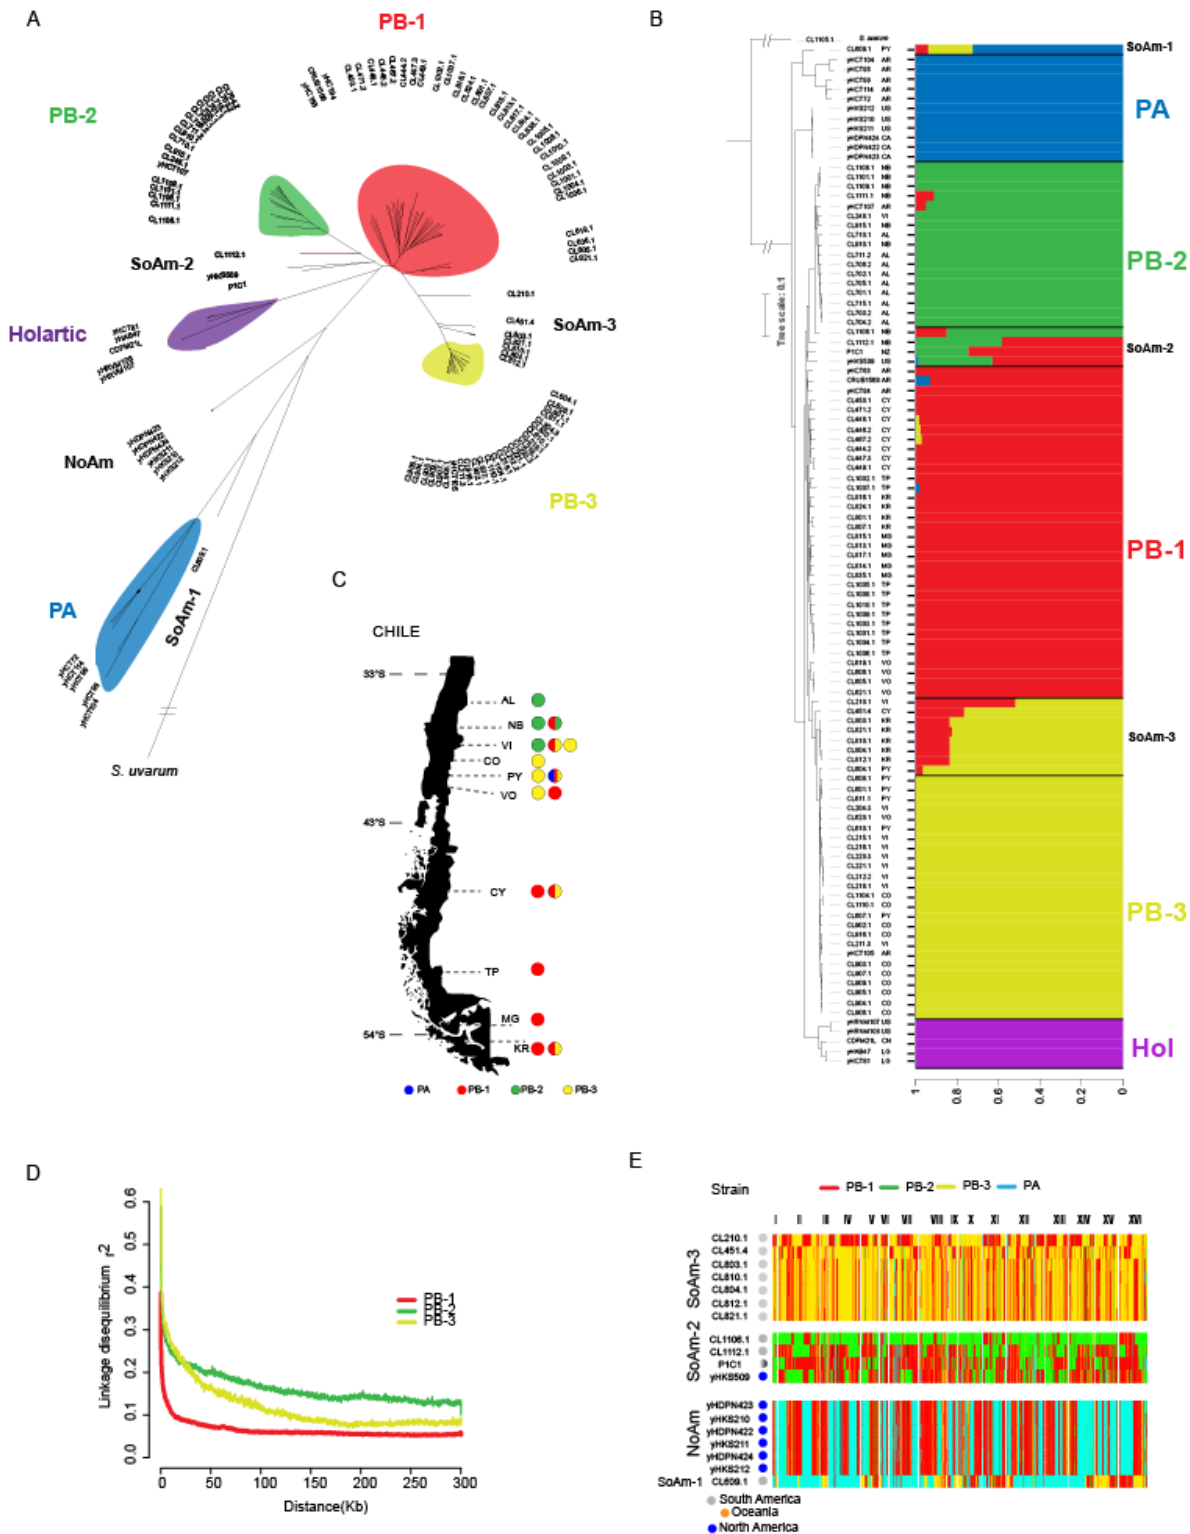

229 Figure 2

230 **Figure 2. Phylogeny of *S. eubayanus*.** (A) Whole genome Neighbour-joining tree built using  
 231 590,909 biallelic SNPs in 105 strains and manually rooted with *S. uvarum* as the outgroup. In all  
 232 cases, bootstrap support values were 100% for all lineages. Three PB clades: PB-1 (red), PB-2  
 233 (green) and PB-3 (yellow) and a single PA clade (blue) were identified, together with admixed strains

234 between the different lineages. Branch lengths correspond to genetic distance. (B) Whole-genome  
235 Neighbour-joining tree of 105 strains built as in (A) together with the population structure generated  
236 with STRUCTURE. An optimum  $k = 5$  groups was obtained. The geographic origin of each strain in  
237 depicted as follows: Canada (CA), United States (UN), China (CN), Lager (LG), AR (Argentina), New  
238 Zeland (NZ), AL (Altos de Lircay), NB (Nahuelbuta), Villarrica (VI), Choshuenco (CO), Puyehue (PY),  
239 Osorno Volcano (VO), Coyhaique (CY), Torres del Paine (TP), Magallanes (MG) and Karukinka (KR).  
240 (C) Lineages distribution across sampling sites including PB lineages and SoAm admixed lineages.  
241 (D) Linkage disequilibrium decay over distance (kb) expressed in terms of correlation coefficient,  $r^2$ .  
242 LD decay for each window was estimated as the pairwise average for all SNPs pairs separated by  
243 no more than 100 kb. The PB-1 lineage shows the lowest LD values compared to any other population  
244 in our collection (E). Genome-wide ancestry for admixed strains. Bins of 100 SNPs were assigned in  
245 the admixed strains to the populations PB-1 (red), PB-2 (green), PB-3 (yellow) or PA (blue) based on  
246 sequence similarity.

247

248 This could be explained by greater inbreeding or outbreeding rates in the clade. Indeed,  $F_{is}$   
249 values (Wright's inbreeding coefficient) were significantly higher ( $p$ -value  $< 0.001$ , paired  
250 Student t-test) in PB-1 (average  $F_{is} = 0.9482$  CI = 0.9462 - 0.9503), compared to PB-2 and  
251 PB-3 (average  $F_{is} = 0.9017$  (CI = 0.8974 - 0.906 &  $F_{is} = 0.8856$  CI = 0.8795 - 0.8916,  
252 respectively), suggesting high inbreeding ratios in these populations (**Table S3b**). Moreover,  
253 the PB-1 level of recombination was similar to what is described in domesticated *S.*  
254 *cerevisiae* populations (Liti et al. 2009; Peter et al. 2018).

255 To determine how recombination events influenced the genomes of admixed strains and the  
256 level of genetic exchange between populations, we explored their mosaic genome  
257 compositions and genetic origins. Consequently, we generated similarity plots using 100  
258 SNPs blocks and determined the closest genetic origin for each of the three groups of  
259 admixed strains from each population. The most interesting strain corresponds to CL609.1,  
260 which is a hybrid strain between the PA (58%), PB-1 (20%) and PB-3 (22%) lineages, where  
261 different segments fall into each lineage (**Figure 2E**). Admixed strains clustering nearby the  
262 PB-3 lineage represented another example where mosaic genomes between lineages were  
263 found. These strains could represent hybrids between PB-1 and PB-3, and most of these  
264 strains share the same regions from each population, and therefore suggesting a common  
265 ancestor (**Figure 2E**). Similarly, two admixed strains between PB-1 & PB-2 from Nahuelbuta

266 showed different proportions of blocks of origins. While 79% of the genome of CL1106.1 is  
267 most similar to PB-2, 54% of the genome of CL1112.1 is most similar to genomes of  
268 individuals pertaining to PB-1. Similarly, the P1C1 strain from New Zealand corresponds to  
269 a hybrid originated from PB-1 & PB-2 lineages, while North American strains hybrids  
270 between PB-1 & PB-3, likely suggesting a migration out from Tierra del Fuego and the  
271 Patagonia. These results demonstrate the constant outcrossing and admixture between  
272 subpopulations and the success of the PB-1 branch by contributing to all of the admixed  
273 genomes analysed in our study.

274

### 275 ***Highest nucleotide diversity in Tierra del Fuego populations***

276 Characterizing patterns of genetic variation at the whole-genome level among populations  
277 can provide insights into signatures of selection (Hoban et al. 2016). Therefore, we  
278 calculated nucleotide diversity ( $\pi$ , which corresponds to the average number of nucleotide  
279 differences between individuals per site), genetic differentiation ( $F_{ST}$ ), and neutrality test  
280 statistics: Tajima's D, Fu and Li's D, and Fu's F (**Table S3B**). Genome-wide nucleotide  
281 diversity ( $\pi$ ) differed among PB populations (**Figure 3A**). PB-1 was more genetically diverse  
282 population ( $\pi= 0.00166750$ ) than PB-2 ( $\pi= 0.000959206$ ) and PB-3 ( $\pi= 0.000591578$ ).  
283 These results are in agreement with PB-1 faster LD decay results and the broader  
284 geographic range where this clade is found. Interestingly, samples collected in Coyhaique  
285 showed the highest nucleotide diversity ( $\pi$ ), in agreement with a high abundance of isolates  
286 in this locality (**Figure 3B**). Indeed, southern localities belonging to PB-1 showed  
287 significantly greater  $\pi$  scores compared to the other two lineages, thus in our study PB-1  
288 represents the most genetically diverse population (**Figure 3**). On the other hand, PB-3  
289 isolates from Choshuenco and Villarrica, located further north had the lowest levels of

290 genetic diversity (**Figure 3B**). These results demonstrate a positive and significant ( $p$ -value  
291  $< 0.05$ , Spearman correlation coefficient  $r_s = 0.632$ ) correlation between latitude and genetic  
292 diversity, i.e. the more southern the sampling the higher the genetic diversity found, and this  
293 is likely influenced by greater *N. pumilio* dispersal towards southern regions (**Figure 3C**).

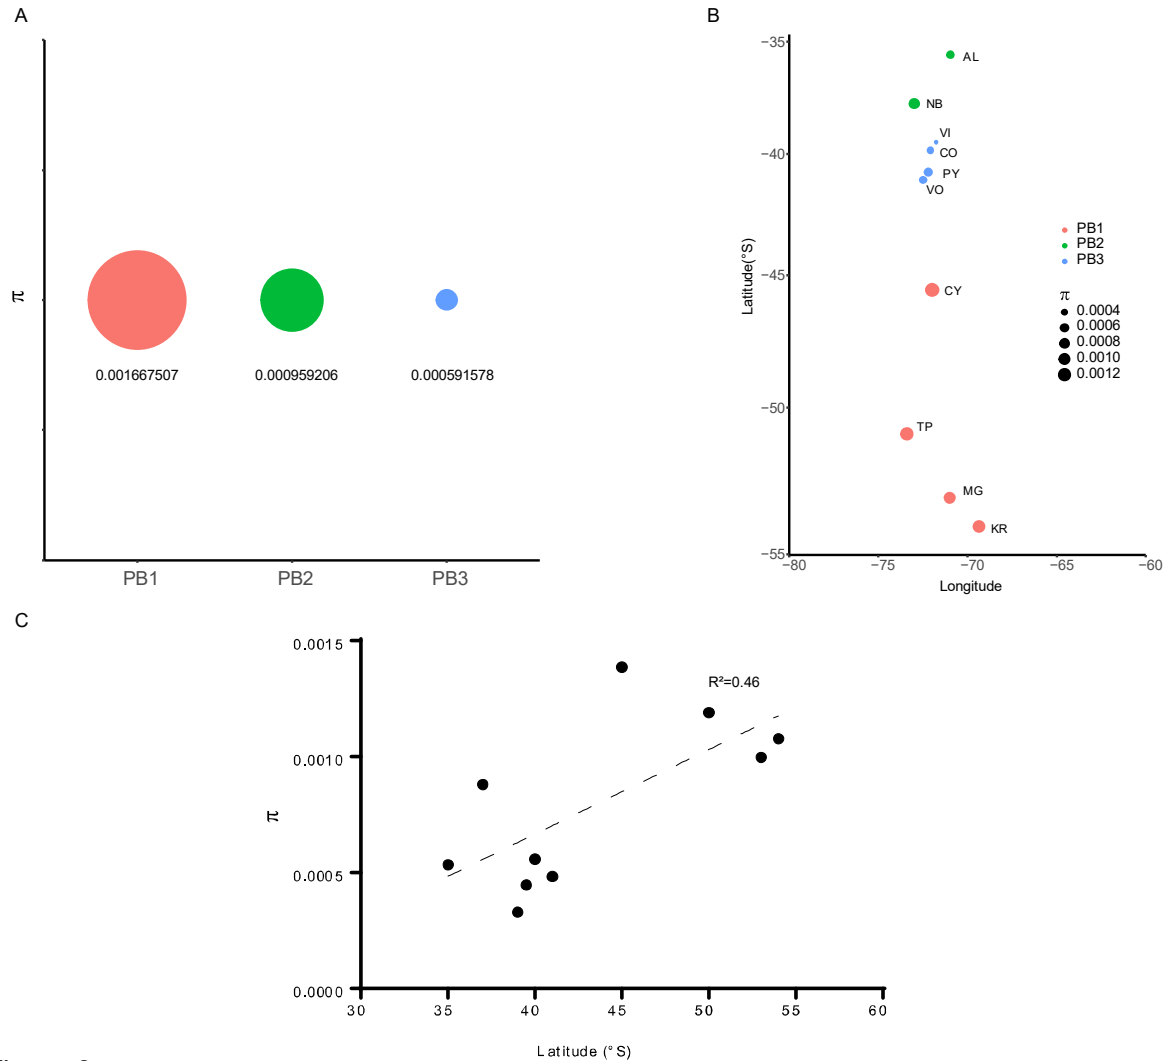

294 **Figure 3**

295 **Figure 3. Nucleotide diversity in *S. eubayanus* across populations and localities in the western**  
296 **side of the Andes.** Nucleotide diversity ( $\pi$ ) in (A) PB populations obtained in this study and (B)  
297 localities across Chile. The geographic origin of each strain is depicted as follows: AL (Altos de  
298 Lircay), NB (Nahuelbuta), Villarrica (VI), Choshuenco (CO), Puyehue (PY), Osorno Volcano (VO),  
299 Coyhaique (CY), Torres del Paine (TP), Magallanes (MG) and Karukinka (KR). (C) Correlation  
300 between nucleotide diversity and latitude.

301 Subsequently, we estimated Tajima's D values (measured as the deviation between  
302 pairwise differences and segregating sites). Tajima's D' scores differed between clades.  
303 Specifically, Tajima's D for PB-2 & PB-3 were positive while this metric was nearly neutral  
304 for PB-1, suggesting balancing selection in the former case and neutral selection for the  
305 latest (**Table S3b**). To determine if the pattern of D' scores was consistent across the whole  
306 genome, we plotted the Tajima's D values along the genome for every 100 SNPs in non-  
307 overlapping windows. Interestingly, PB-3 showed a greater number of regions with positive  
308 Tajima's D scores (>1) compared to the other two clades. This suggests that balancing  
309 selection may maintain allelic diversity in these regions (**Figure S4**).

310 The obtained  $F_{ST}$  values suggest that these populations are genetically different ( $p$ -value <  
311 0.0001, **Figure S5, Table S4**). Our genome-wide analysis allowed us to find only a handful  
312 of regions sharing low Tajima's D values between clades, yet all but one region in  
313 chromosome V exhibited high  $F_{ST}$  values. This genomic island found between PB-1 and PB-  
314 2 exhibited low Tajima's D values and extremely low  $F_{ST}$  values (**Figure S4B & Figure S5**),  
315 suggesting a common genetic ancestry. This region contained four genes: *IRC22*, *MNN1*,  
316 *NOP16* and *PMI40*. From GO term analysis we found enrichment for 'glycosilation' process,  
317 due to the presence of *PMI40* and *MNN1*, the former encoding for an essential mannose-6-  
318 phosphate isomerase that catalyses the interconversion of fructose-6-P and mannose-6-P,  
319 while the latest encoding for an Alpha-1,3-mannosyltransferase. These results suggest that  
320 glycosilation could be under selection in these two populations.

321 We then assessed the degree of genetic differentiation and nucleotide diversity between the  
322 ten sampling sites per lineage. We found moderate to high significant  $F_{ST}$  values ranging  
323 from 0.16 to 0.88 (**Table S4**). Torres del Paine and Magallanes, two localities clustering in  
324 PB-1 and separated by ~ 200 km had the lowest  $F_{ST}$  values, while Villarrica and Altos de  
325 Lircay (separated by 400 km) were the most genetically differentiated (**Table S4**). A mantel

326 test showed a significant correlation between the geographic and the genetic distances  
327 (isolation by distance,  $p$ -value < 0.05) among sampling sites of the PB-1 lineage. The  
328 number of pairwise comparisons was insufficient to test for IBD for lineages PB-2 and PB-  
329 3. The positive IBD for PB-1 indicates limited effective dispersal within this lineage (**Figure**  
330 **S6**).

331

### 332 ***Pangenome and genome content variation***

333 In order to compare the genome content, we constructed the pangenome across all isolates.  
334 We identified 5,497 non redundant pangenomic ORFs in the species. Out of these, 5,233  
335 ORFs are core systematically present in all of the isolates, while 264 are dispensable, being  
336 only found in subsets of strains. A PCA analysis of the presence/absence profile of these  
337 ORFs was used to visualize potential overlap between genome content similarities and  
338 SNPs distance (**Figure 4**). In partial concordance with the phylogenetic tree, the branch  
339 harbouring the Chinese isolate, which also contained two North American isolates,  
340 represented the most divergent clade. The common grouping of Chinese and North  
341 American isolates together with their sequence similarity, suggests a recent migration event  
342 between Asia and America. Clear genetic differences were also found between PB-3 and  
343 the other clades. This suggests reduced admixture of these genomes, but a relatively recent  
344 separation. On the other hand, isolates from PB-1 and PB-2 distribute close to each other  
345 representing two halves of the same cluster, which can either suggest an extremely recent  
346 separation between the two clades, or continuous admixture. Interestingly, in our analysis  
347 PA isolates were extremely close to the PB-1 isolates, indicating extensive overlapping in  
348 genome content.



349 To identify potential lateral gene transfer (LGT) events from other species, we compared the  
350 ORF sequences with an in-house database containing the ORFeome of 57 representative  
351 species

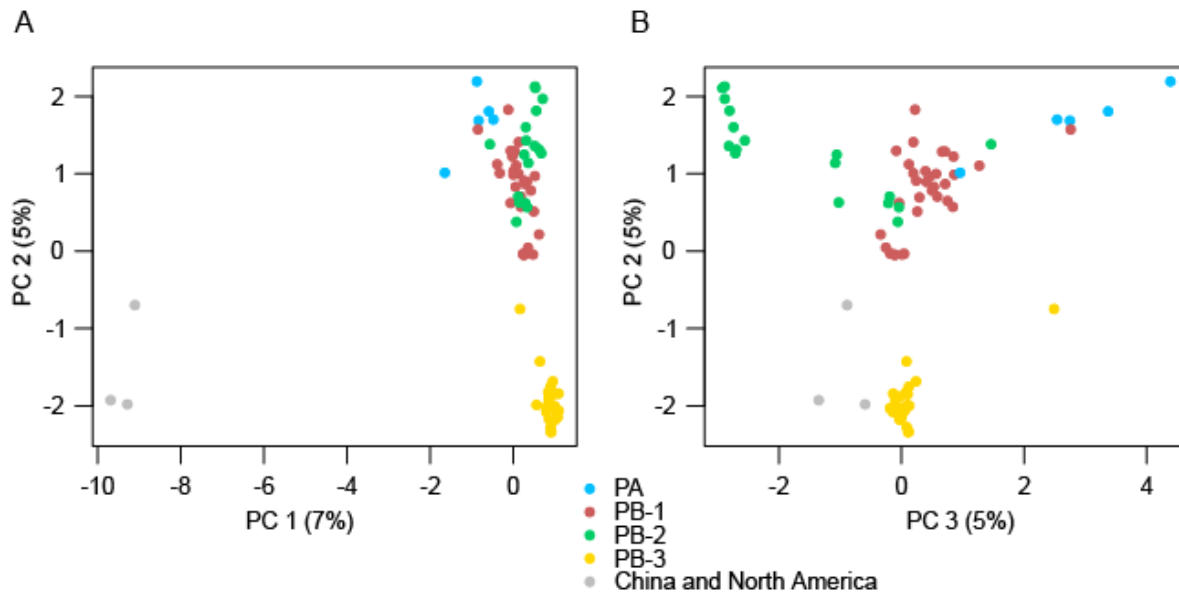

352 **Figure 4.**

353 **Figure 4. PCA of the gene's presence-absence profiles.** (A) Principal component analyses of the  
354 first three components show a reasonable level of concordance between sequence variation and  
355 genome content difference. Chinese/North American branch can be easily separated from the South  
356 American clades. Only non-mosaic 83 isolates from all populations were considered. (B) Principal  
357 component analyses considering only PB populations. Middle positioning of PB-1 mirrors the shape  
358 of the un-rooted phylogenetic tree based on the sequence divergence (Fig.2A). Interestingly, the PB-  
359 3 is the most separated clade, suggesting a lower level of outbreeding, while a partial overlap can be  
360 identified between the other clades.

361

362 We identified nine ORFs present in a group of nine closely related isolates belonging to the  
363 PB-2 clade (CL248.1, CL701.1, CL702.1, CL705.1, CL710.1, CL711.1, CL715.1, CL910.1  
364 and CL915.1), and six of the strains were isolated from the same locality and were  
365 assembled within a single contig for each isolate (*S. eubayanus* Region A). In two of these  
366 isolates (CL701.1 and CL248.1) these ORFs appear to be duplicated. SMART was used to  
367 identify known PFAM protein domains. These comprise putative proteins with an arginase

368 domain, a MFS\_1 (Major facilitator superfamily), a membrane transport protein domain, a  
369 Fungal specific transcription factor domain, a Gal4-like dimerization domain and a  
370 transmembrane one (**Figure S7**). In addition to these high-confidence hits, a search for  
371 homologies, also performed using SMART, indicated the presence of potential glucosidase  
372 domain in four of the other ORFs and a homing endonuclease on another one (**Figure S7**).  
373 The absence of matches from a search in the NCBI non-redundant database suggest the  
374 presence of orphan genes from an external un-sequenced donor species.

375 Furthermore, we also identified 64 private ORFs in the Chinese/North American clade. Out  
376 of 64 such ORFs, at least 20 correspond to orthologs of other genes found in *S. eubayanus*  
377 (showing an identity percentage between 94% and 76%). For the majority of such ORFs no  
378 potential donor species has been found. That being said, one of these ORFs was identified  
379 as a *MALS* gene which encodes for a maltase enzyme also found in *S. uvarum* x *S.*  
380 *eubayanus* hybrids (*S. bayanus*). These ORFs are not found clustered together, but rather  
381 scattered across several contigs in the assemblies. A phylogenetic analyses performed  
382 gene by gene indicates the potential donor species to have an intermediate distance  
383 between *S. eubayanus* and *S. arboricola*, although the presence of more than one donor  
384 cannot be categorically excluded. It is possible that different subset of these ORFs have  
385 different evolutionary origins. Among these ORFs, we could also find ancestral segregating  
386 genes, paralogs of other *S. eubayanus* genes and lost in the lineage from which the South  
387 American clades originated.

388

### 389 ***Phenotypic diversity among S. eubayanus isolates***

390 *S. eubayanus* phenotypic diversity was assessed in a set of 88 isolates, representative of  
391 the different clades found across the American continent. High-resolution growth

392 quantification was conducted under eight environmental conditions. These conditions  
393 included different growth temperatures, salt resistance, glucose and maltose utilization and  
394 antimicrobial compounds. Three growth variables were extracted: the lag phase, growth rate  
395 ( $\mu_{\max}$ ) and maximum OD (maxOD) (**Table S7a**) generating phenotypic data for 24 attributes  
396 from the growth curves. We found a significant correlation between  $\mu_{\max}$  and maxOD, and  
397 therefore we focused on these two as fitness parameters and compared them across  
398 isolates & conditions. We found that bivariate correlations among traits vary considerably  
399 (**Table S7b**). For example, the conditions NaCl, and CuSO<sub>4</sub> showed a positive  $\mu_{\max}$   
400 correlation (Pearson  $r = 0.47$ ,  $p$ -value  $< 6 \times 10^{-9}$ ), where both traits likely share similar  
401 molecular pathways (Dhar et al. 2013). Conversely, there was no significant  $\mu_{\max}$   
402 correlation between NaCl and Hygromycin resistance (Pearson  $r = 0.12$ ,  $p$ -value = 0.14).  
403 NaCl and 34°C represented the two phenotypes exhibiting the greatest phenotypic  
404 coefficients of variation (47% and 62%) for  $\mu_{\max}$  and maxOD, respectively, suggesting  
405 ecological niche differentiation and mutation accumulation in these polygenic traits across  
406 the strains.

407 We then generated a clustered heat map of the phenotypic correlations between yeast  
408 isolates across all traits for  $\mu_{\max}$  (**Figure 5**). Phenotypic clustering was mostly driven by  
409 geography, rather than by genetic relationship. North American Holarctic strains clustered  
410 separately and showed low  $\mu_{\max}$  and maxOD scores across traits. The CBS12357<sup>T</sup> strain  
411 clustered together with PB-1 strains from Torres del Paine. This clustering was further  
412 supported by the principal component analysis, both of which produced the main groups  
413 split by localities, rather than lineages, where only PB-2 isolates grouped together (**Figure**  
414 **S8**). Specifically, only for certain phenotypes we found differences among localities (**Table**  
415 **S8**).

416

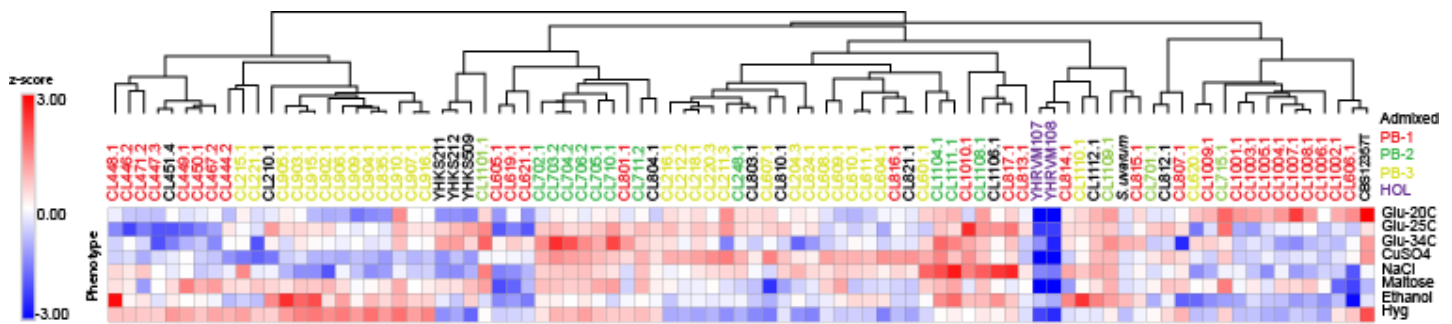

Figure 5

417 **Figure 5. Phenotypic diversity in *S. eubayanus*.** Heat map depicting the phenotypic diversity in *S.*  
418 *eubayanus* obtained from eight different conditions assessed in microcultures. Strains are grouped  
419 by hierarchical clustering and names & colours indicate the clade. The heat maps were elaborated  
420 based on z-scores within each phenotype.

421

422 For example, northern isolates obtained from Altos de Lircay and Nahuelbuta had greater  
423  $\mu_{max}$  when grown at high temperatures (34°C) than isolates from other localities ( $p$ -value <  
424 0.05, Tukey test). This suggests that northern isolates might be adapted to warmer climates.  
425 Altogether, our results demonstrate a relatively low phenotypic diversity across traits and  
426 strains, and most of this diversity can be explained by habitat adaptation rather than by  
427 phylogenetic history.

428

#### 429 **Isolates from lower latitudes exhibit greater fermentation performance**

430 Given the importance of *S. eubayanus* in lager brewing, we then evaluated the fermentation  
431 performance of the same set of strains previously phenotyped and used the W34/70 lager  
432 strain as fermentation positive control. The conditions included 12°P wort at 12°C in 50 mL  
433 (micro-fermentations batches). For this, CO<sub>2</sub> loss was recorded every day and metabolite  
434 consumption (glucose, fructose, maltose and maltotriose) and production (glycerol and  
435 ethanol) was estimated at the end of the fermentation process. In all cases, the lager control

436 showed better fermentation performance compared to the majority of *S. eubayanus* isolates  
437 ( $p$ -value < 0.05, t-test, **Table S9a**), except for five strains from Altos de Lircay and Villarrica.  
438 This strains showed not-significantly differences in CO<sub>2</sub> lost levels compared to the lager  
439 control ( $p$ -value > 0.05, Student test), demonstrating the greater beer fermentation potential  
440 of these strains. Overall, we observed that isolates obtained at lower latitudes (Central  
441 region) lost significantly greater CO<sub>2</sub> levels than individuals obtained at higher latitudes  
442 (extreme South). For example, Magallanes isolates belonging to PB-1 showed 2X lower  
443 fermentation performance than isolates obtained from Altos de Lircay (PB-2), which are  
444 separated by approximately 1,800 km (**Table S9b**). Indeed, we found a significant  
445 correlation (Pearson  $r = 0.566$ ,  $p$ -value < 0.001) when we compared latitude vs CO<sub>2</sub> lost  
446 (**Figure 6A**) and significant differences between localities (**Table S9b**). Furthermore, we  
447 found that fermentation performance was directly correlated with maltose sugar  
448 consumption (Pearson  $r = 0.52$ ,  $p$ -value <  $6 \times 10^{-8}$ , **Table S10, Figure 6B**), and ethanol  
449 production (Pearson  $r = 0.56$ ,  $p$ -value <  $2 \times 10^{-6}$ ).

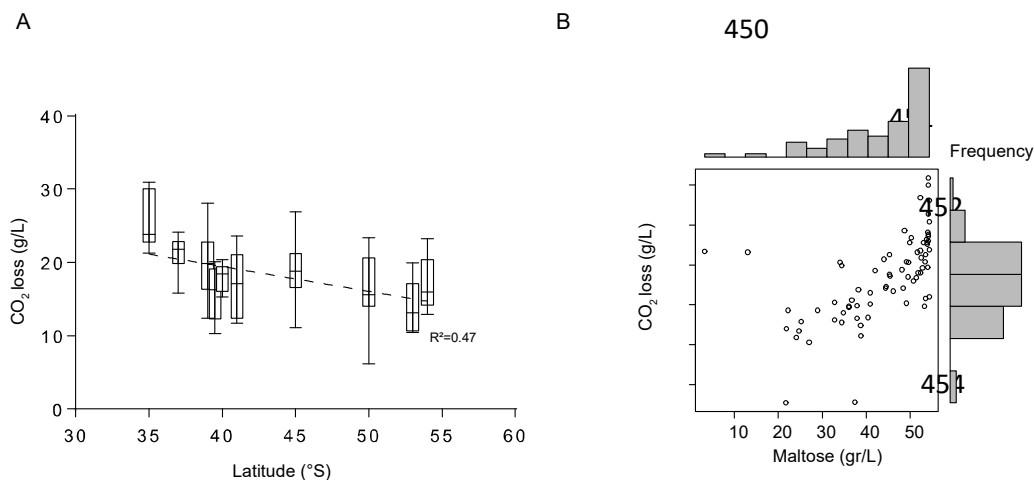

455

Figure 6

456

457 **Figure 6. Fermentative profile of *S. eubayanus* strains.** (A) CO<sub>2</sub> loss levels represent the  
458 fermentative capacity of wild isolates obtained from microfermentations. Error bars denote the  
459 standard deviation (B) Maltose consumption was directly correlated with CO<sub>2</sub> loss and latitude of the  
460 origin of the isolate.

461 In order to determine the molecular basis of differences in maltose consumption and  
462 fermentation performance, we evaluated the impact of polymorphisms and indels within the  
463 *AGT1* gene. This gene encodes for a high-affinity maltose and maltotriose transporter in *S.*  
464 *pastorianus* and is responsible for the maltotriose consumption under fermentative  
465 conditions (Nakao et al. 2009). Three copies along the reference genome were found in  
466 chromosomes V (DI49\_1597), XIII (DI49\_3958) and XVI (DI49\_5193), exhibiting a sequence  
467 identity above 55% and hereafter denominated as *AGT1\_V*, *AGT1\_XIII* and *AGT1\_XVI*. In  
468 fact, analysing sequence variation across strains revealed that phylogenetic trees differed  
469 between *AGT1* copies (**Figure S9A**). Interestingly, we found that some strains do not carry  
470 all three functional copies of the Agt1 protein. This loss of function is caused by deletions  
471 that generate truncated proteins. For the *AGT1\_V* encoded transporter, truncation occurs  
472 after 50 aminoacids, for the *AGT1\_XIII* encoded transporter it occurs after 180 aminoacids,  
473 and for the *AGT1\_XVI* encoded transporter it occurs after 293 aminoacids (**Figure S9B**).  
474 Interestingly, PB-2 isolates did not carry any of the truncations, however many non-  
475 synonymous polymorphisms were found within the *AGT1* sequences. Indeed, docking  
476 simulations indicate reduced maltose and maltotriose binding capacity in the truncated  
477 proteins in comparison to the non-truncated Agt1p copies (**Figure S9C**,  $p$ -value < 0.001  
478 Student-test). Nevertheless, we did not find a direct correlation between fermentation  
479 performance and a specific truncated Agt1p copy or a significant correlation between  
480 fermentation performance and number of copies of the functional Agt1p transporter. These  
481 results suggest that other genomic regions might be involved in maltose uptake generating  
482 the observed differences in fermentation performance.

483

484

485

486 **DISCUSSION**

487 Our results, as well as others (see (Libkind et al. 2011; Peris et al. 2014) strongly suggest  
488 that *S. eubayanus* is preferentially found in association with *Nothofagus* trees, particularly  
489 *N. pumilio* (the most cold-adapted *Nothofagus* (de Porras et al. 2012; Hinojosa et al. 2016b).  
490 Under this scenario, the biogeographic history of *S. eubayanus* should be strongly correlated  
491 with the *Nothofagus* dispersal history across the globe. Interestingly, the isolation frequency  
492 of *S. eubayanus* was correlated with the latitude. PB-1 is located at higher latitudes (and  
493 lower altitudes) and the isolation frequency of this lineage was lower than that of the other  
494 two. Overall, PB-2 and PB-3 were easily recovered from the environment and were  
495 specifically associated with high altitude *N. pumilio* trees. These results are in agreement  
496 with those reported for *S. eubayanus* in Argentina (Eizaguirre et al. 2018). The lower  
497 frequency of isolates found in samples from Tierra del Fuego could be due to the extreme  
498 environmental conditions confronted in this part of the continent, with average temperatures  
499 below 5°C throughout most of the year (Ponce and Fernández 2014). However, the  
500 extended distribution and higher abundance of *N. pumilio* in Tierra del Fuego compared to  
501 northern areas may facilitate *S. eubayanus* survival, range distribution, and habitat  
502 colonization (Hildebrand-Vogel et al. 1990) increasing population size and genetic diversity.  
503 The genus *Nothofagus* was originated during the late Cretaceous-Early Tertiary interchange  
504 (ca. 135 MYA); between Southeast Asia and Australia, from a “fagalean” complex in  
505 Southeast Asia (Hill 1992b; Hinojosa et al. 2016b). At the time, Antarctica was in a northern  
506 position connecting South America, Tasmania, Australia and New Zealand; and had a warm-  
507 humid climate (=“mesothermal conditions”, sensu (Hinojosa et al. 2016b)). Then, a step-  
508 wise dispersion-colonization wave following a westward direction reached South America.  
509 This scenario is consistent with a dispersal of the *S. eubayanus* and *S. uvarum* ancestor  
510 across the South Hemisphere (Hill 1992a; Hershkovitz 1999; Dutra and Batten 2000).

511 The phylogenetic analysis presented here of wild *S. eubayanus* demonstrates that the  
512 Patagonia B lineage is actually composed of three clean lineages: PB-1, PB-2 and PB-3.  
513 Interestingly, no strains belonging to the Patagonia A lineage were found amongst our  
514 samples despite this lineage being highly abundant in Argentinian Patagonia (Eizaguirre et  
515 al. 2018; Langdon et al. 2019). From the linkage disequilibrium analysis we found smaller  
516 linkage blocks and higher *F<sub>is</sub>* values in the PB-1 cluster, compared to PB-2 and PB-3. This  
517 suggests that meiosis and inbreeding are more frequent in PB-1. Additionally, the nucleotide  
518 diversity of PB-1 was higher than that of the other populations, and this was supported by  
519 greater genetic diversity among individuals sampled from Coyhaique, Torres del Paine,  
520 Magallanes and Karukinka locations. Individuals from these sites had high nucleotide  
521 diversity which is interesting given that dispersal of *N. pumilio* is also greater than in northern  
522 regions. Nevertheless, southern regions only contained individuals from a single lineage,  
523 contrasting northern sites which harbour individuals from more than a population.  
524 Interestingly, a subgroup of the PB-1 isolates is found at lower latitudes, which means that  
525 PB-1, PB-2 and PB-3 are sympatric. Indeed, our STRUCTURE and pan-genome analyses  
526 provide evidence of contact and admixture between PB-1 and the other two. That being  
527 said, some of these admixed strains have migrated to other regions around the world,  
528 including North America, China and Oceania. Overall, all of the admixed strains from Chile,  
529 New Zealand and North America contained regions from the PB-1 lineage, suggesting an  
530 'out-of-Patagonia' origin for most strains in the Holarctic lineage, and even Oceania, and  
531 demonstrating the success of the PB-1 lineage.

532 The genetic diversity reported here for the PB South American clades is higher than that  
533 reported for *S. eubayanus* in the Northern Hemisphere (Peris et al. 2016). Indeed, our results  
534 resemble those obtained in the sister species for *S. uvarum*, where similar sequence  
535 divergence among *S. uvarum* populations were described (Almeida et al. 2014).



536 Interestingly, based on the levels of genetic diversity and heterozygosity, our results support  
537 the idea that PB-1 *S. eubayanus* from Tierra del Fuego is the oldest population in Patagonia,  
538 and likely within the species. In fact, this lineage shows high levels of  
539 hybridization/introgression into northern populations (see Fig 2). This scenario is also  
540 consistent with the idea that *S. eubayanus* cryotolerance evolved recently, as *N. pumilio* (its  
541 preferred environment) became secondarily adapted to cold during the orogenesis of the  
542 Andes, a relatively young mountain range (de Porras et al. 2012; Hinojosa et al. 2016a;  
543 Horton 2018). Also, it is now accepted that the distribution of *Nothofagus* (and subsequently  
544 *S. eubayanus*) was already established in Patagonia before the onset of the last glacial  
545 maximum (ca 20,000 years ago), whose ice sheets covered most land masses south of 41°.  
546 Thus, there was massive floristic recolonization and ecological succession after this period  
547 (Sersic et al. 2011; de Porras et al. 2012). Our results are consistent with this second  
548 scenario (colonization from peripheral glacial refugia from the South) since we found lower  
549 genetic diversity in populations located in central Chile (Altos de Lircay & Nahuelbuta) than  
550 in populations found in southern Chile (Coyhaique, Torres del Paine, Magallanes and  
551 Karukinka). Interestingly, a different pattern would be observed on the other side of the  
552 Andes (Argentinian territory), where a lower number of peripheral glacial refugia occurred  
553 and most of the diversity would originate from Valleys refugia in northern sites (Sersic et al.  
554 2011). Indeed, in Argentina a greater *S. eubayanus* genetic diversity is reported north of  
555 41°, where different lineages congregate in a single geographic location (Langdon et al.  
556 2019). Thus, different glaciation refugia would have shaped the current genetic diversity and  
557 dispersal of *S. eubayanus* populations in Patagonia.

558 Our phenotypic assay demonstrates a relatively low phenotypic diversity between  
559 populations and localities, providing evidence that these populations might have  
560 experienced mild selective pressures in the environments here evaluated. Individuals

561 located in northern populations grew much faster at higher temperatures than individuals  
562 from the south, in agreement with the idea of local adaptation. High temperature growth has  
563 been extensively studied in *S. cerevisiae* isolates (Steinmetz et al. 2002; Parts et al. 2011;  
564 Yang et al. 2013; Wilkening et al. 2014), where several natural variants were mapped down  
565 to the gene level. The fact that fermentation capacity was negatively correlated with latitude  
566 represents a striking to the low phenotypic diversity found under microcultivation conditions,  
567 suggesting that isolates found in northern regions could represent potential new strains for  
568 the brewing industry. Specifically, strains found at lower latitudes showed greater CO<sub>2</sub>  
569 release and maltose consumption, contrasting with fermentation performances obtained in  
570 the east side of the Andes where northern isolates belonging to the PA lineage showed  
571 lower fermentation performances (Eizaguirre et al. 2018). Selection in maltose transporter  
572 could impact sugar assimilation (Brickwedde et al. 2018). In this context, the *AGT1* gene  
573 encodes for a high-affinity maltose and maltotriose transporter (Alves et al. 2008) and is  
574 responsible for this capacity in *S. pastorianus*. *S. eubayanus* strains carry different putative  
575 copies of *AGT1*, however none of these are directly correlated with fermentation  
576 performance nor with the transport of maltotriose. Yet, overexpression of a Holarctic allelic  
577 variant of *seAGT1* was able to confer maltotriose consumption (Baker and Hittinger 2019).  
578 As expected, in our study no wild *S. eubayanus* isolate was found to consume maltotriose;  
579 this was not surprising given that *S. cerevisiae* is the only *Saccharomyces* species in the  
580 genus able to utilize maltotriose as its carbon source (Krogerus et al. 2015 2018).

581 In sum, our results provide evidence of an 'Out-of-Patagonia' dispersal in the *S. eubayanus*  
582 species and that this dispersal is responsible for the current extensive genetic diversity found  
583 in the species. The majority of the *S. eubayanus* strains collected around the world belong  
584 to the Patagonian cluster, even a subset of those recently found in China, supporting a  
585 successful colonization from Out-of-Patagonia towards the Northern Hemisphere and

586 Oceania. Finally, our data in *S. eubayanus* together with previous evidence in *S. uvarum*  
587 (Almeida et al. 2014) could possibly suggest that the ancestor of both species originated in  
588 the South Hemisphere, rather than China. However, the current available data is insufficient  
589 to draw further conclusions regarding the evolutionary history of the two species and future  
590 studies and evidences are needed to support these results.

591

## 592 **MATERIALS AND METHODS**

### 593 *Sample areas and yeast isolation*

594 Bark samples from 'lenga' (*Nothofagus pumilio*), coigüe (*N.dombeyi*) and 'ñirre' (*N.*  
595 *Antarctica*) and *Araucaria araucana* were obtained aseptically from ten sampling sites in  
596 Chile (collection date, **Figure 1**): National Park Altos de Lircay (January 2018, 35°36'34"S,  
597 70°57'58"W), Nahuelbuta National Park (February 2018, 37°47'33"S, 72°59'53"W),  
598 Villarrica National Park (January 2017, 39°28'52"S, 71°45'50"W), Choshuenco National  
599 Park (January 2018, 39°50'2"S, 72°4'57"W), Antillanca National Park (November 2017,  
600 40°46'23"S, 72°12'15"W), Vicente Pérez Rosales National Park (November 2017,  
601 41°6'15"S, 72°29'45"W), Coyhaique National Reserve (February 2017, 45°31'23"S,  
602 71°59'19"W), Torres del Paine National Park (February 2018, 50°56'32"S, 73°24'24"W),  
603 Magallanes National Reserve (January 2018, 53°8'45"S, 71°0'12"W) and Karukinka Natural  
604 Park (January 2018, 54°6'4"S, 69°21'24"W). All sampling sites were located at least five km  
605 from human settlements.

606 For each site, at least 25 bark samples of about 1g and 20 x 1 mm were obtained and  
607 immediately incubated in a 15 mL tube containing 10 mL of enrichment media. The media  
608 contained 2% yeast nitrogen base, 1% raffinose, 2% peptone and 8% ethanol (Sampaio and  
609 Goncalves 2008). Overall, 553 samples were collected (**Table S1**). Samples were incubated

610 for two weeks at 20°C without agitation and were subsequently vortexed and plated (5 µL)  
611 onto YPD agar (1% yeast extract, 2% peptone, 2% glucose and 2% agar). Isolated colonies  
612 were stored in glycerol 20% v/v and stored at -80°C in the Molecular Genetics Laboratory  
613 yeast collection at Universidad de Santiago de Chile.

#### 614 *Saccharomyces eubayanus* identification and FACS analysis

615 We amplified and sequenced the internal transcribed spacer region (ITS) to identify colonies  
616 to the genus level. For this, ITS1 and ITS4 primers (J White et al. 1990) were used and we  
617 classified as *Saccharomyces* fragment sizes ranging between 830 and 880 bp (Pham et al.  
618 2011). Species identification was conducted using the polymorphic marker *GSY1* and *RIP1*  
619 through amplification and enzyme restriction (see details in (Peris et al. 2014)). Then,  
620 restriction fragment length polymorphism were performed using the restriction enzymes  
621 *HaeIII* and *EcoRI* as previously described (Peris et al. 2014). Colonies were classified based  
622 on restriction patterns as either *S. eubayanus*, *S. uvarum* or *S. cerevisiae* (Peris et al. 2014).  
623 In many cases, species identification was confirmed by Sanger-sequencing of the ITS  
624 region, which was attained using a BLASTN against the Genbank database under 100%  
625 identity as threshold.

626 DNA content was analysed using a propidium iodide (PI) staining assay. Cells were first  
627 pulled out from glycerol stocks on YPD solid media and incubated overnight at 30 °C. The  
628 following day a small portion of each patch was taken with a pipette tip and transferred in  
629 liquid YPD in a 96-well plate and incubated overnight at 30 °C. Then, 3 µl were taken and  
630 resuspended in 100 µl of cold 70% ethanol. Cells were fixed overnight at 4 °C, washed twice  
631 with PBS, resuspended in 100 µl of staining solution (15 µM PI, 100 µg/ml RNase A, 0.1%  
632 v/v Triton-X, in PBS) and finally incubated for 3 h at 37 °C in the dark. Ten thousand cells for  
633 each sample were analysed on a FACS-Calibur flow cytometer using the HTS module for  
634 processing 96-well plates. Cells were excited at 488 nM and fluorescence was collected with

635 a FL2-A filter. The data collected were analysed in R with flowCore (Hahne et al. 2009) and  
636 flowViz (Sarkar et al. 2008) and plotted with ggplot. The highest density value of FL2-A was  
637 associated with the ploidy level of G1 cells, thus cells that are not dividing, and used for  
638 inferring the ploidy state of the sample. FL2-A values between 60 and 110 for G1 cells were  
639 associated with haploid state, FL2-A values between 120 and 220 were associated with  
640 diploid state and FL2-A values between 290 and 400 were associated with a tetraploid state.

#### 641 *Sequencing, Reads processing and Mapping*

642 DNA was obtained using a Qiagen Genomic-tip 20/G kit (Qiagen, Hilden, Germany). The  
643 library prep reaction used was a 100x miniaturized version of the Illumina Nextera method.  
644 In this prep, 1.6 ng of total DNA mass is tagmented in a 5X diluted Tagmentation reaction.  
645 The 0.5  $\mu$ L reaction was quenched by 0.5% SDS(0.125% final concentration) at room  
646 temperature for 5 minutes. After quenching, 125 nL of a P5 sequencing barcode and 125 nL  
647 of a P7 sequencing barcode were added to the 0.625 nL reaction. In order to amplify the  
648 library of inserts, 24.125  $\mu$ L of 1X KAPA Library Amplification Master Mix were added to the  
649 reaction. The library went through 15 cycles of PCR to add the barcodes to then amplify the  
650 library to a concentration >4 nM. The libraries were then normalized and pooled according  
651 to the Illumina standard operating procedure and sequenced on a NextSeq 500/550 High  
652 Output Kit v2.5 (300 Cycles) flow cell.

653 Read quality and summary statistics were examined using FastQC 0.11.8 (Andrews 2014).  
654 Reads were processed with fastp 0.19.4 (low quality 3' end trimming, 37 bp minimum read  
655 size) (Brickwedde et al. 2018; Chen et al. 2018). We also obtained publicly available  
656 sequencing reads of *S. eubayanus* (Bing et al. 2014; Gayevskiy and Goddard 2016; Peris  
657 et al. 2016; Brickwedde et al. 2018) and *S. pastorianus* (Baker et al, 2015} from the SRA  
658 database, which were processed similarly, i.e. visual inspection with FastQC and processing  
659 adaptors, low quality 3' ends, and read size, with fastp. Processed reads were aligned

660 against the *Saccharomyces eubayanus* CBS12357<sup>T</sup> reference genome (Brickwedde et al.  
661 2018) using BWA-mem (options: -M -R)(Li 2013). Mapping quality and overall statistics were  
662 collected and examined with Qualimap (García-Alcalde et al. 2012). Summary statistics are  
663 shown in **Table S2**. Sorting and indexing of output bam files were performed using  
664 SAMTOOLS 1.9 (Li et al. 2009). A *S. uvarum* isolate (CL1105) isolated from Nahuelbuta  
665 was also mapped to the *S. eubayanus* and *S. uvarum* CBS7001 genome (Scannell et al.  
666 2011; Almeida et al. 2014) for phylogenetic analysis.

#### 667 *Variant calling*

668 Mapping files were tagged for duplicates using MarkDuplicates of Picard tools 2.18.14  
669 (<http://broadinstitute.github.io/picard/>). Variant calling and filtering was done with GATK  
670 version 4.0.10.1 (DePristo et al. 2011). More specifically, variants were called per sample  
671 and chromosome using HaplotypeCaller (default settings), after which variant databases  
672 were build using GenomicsDBImport. Genotypes for each chromosome were called using  
673 GenotypeGVCFs (-G StandardAnnotation). Variant files were merged into one genome-  
674 wide file using MergeVcfs. This file was divided by SNP calls and INDEL calls using  
675 SelectVariants. We applied GATK recommended filters to both variant files, i.e. for SNPs  
676 “QD < 2.0 || FS > 60.0 || MQ < 40.0 || MQRankSum < -12.5 || ReadPosRankSum < -8.0”,  
677 and for INDELS “QD < 2.0 || FS > 200.0 || ReadPosRankSum < -20.0”. We then processed  
678 the SNPs VCF file with vcftools (---minQ 30, --max-missing 1 , --max-alleles 2 (Van der  
679 Auwera et al. 2013). Furthermore, we applied a stricter criteria to filter heterozygous calls  
680 using bcftools view (-e 'GT="0/1" & QUAL<7000 & AC=1') version 1.9 (Li et al. 2009)}. In  
681 addition, the effect of each variant was assessed and annotated with SnpEff version 4.3t  
682 (Cingolani et al. 2012), using an updated version of *S. eubayanus* gene annotations  
683 (Brickwedde et al. 2018)

#### 684 *Phylogeny analyses*

685 We obtained a phylogenetic tree using 590,909 biallelic SNPs. VCF files were imported to  
686 R (version 3.5.2)(Development Core Team) and converted to genlight objects with vcfR  
687 version 1.8.0 (Knaus and Grunwald 2017). A bitwise distance matrix was calculated with the  
688 package poppr version 2.8.1 (Kamvar et al. 2014), and a neighbour-joining tree was built  
689 using the function about, using 1000 bootstraps. Trees were visualized in the iTOL website  
690 (<http://itol.embl.de>). A thinned version of the VCF file was generated with vcftools 0.1.15 (--  
691 thin 1000)(Danecek et al. 2011), containing 9,885 similarly-spaced SNPs. Structure was run  
692 on this dataset five times for K values ranging from 3 to 7, with 10,000 burn-in and 100,000  
693 replications for each run and using admixture model, infer alpha, lambda =1, fpriormean =1,  
694 unifprioralpha 1, alpha max 10. The structure-selector website was used to obtain the  
695 optimal K values (<http://lmm.qdio.ac.cn/StructureSelector/>) (Li and Liu 2018) according to  
696 the Evanno method (Evanno et al. 2005) and to obtain the final results for each K, which  
697 were plotted using CLUMPAK (Kopelman et al.). The resulting diagrams were visualised  
698 using structure plot (<http://omicsspeaks.com/strplot2/>)(Ramasamy et al. 2014). In addition,  
699 we performed clustering analyses of the same samples by using Discriminant Analysis of  
700 Principal Components (DAPC) of the adegenet R package version 2.1.1 (Jombart 2008) run  
701 with PB-1, PB-2 and PB-3 as population priors. Linkage disequilibrium (LD) between  
702 lineages was calculated using variants belonging to each Patagonia B population. LD decay  
703 was estimated by calculating R<sup>2</sup> values using with vcftools (----geno-r2 --ld-window-bp  
704 100000), which were imported into R to calculate a regression according to (Hill and Weir  
705 1988), for which the half decay was estimated (Ldmax/2).

## 706 *Population Genetics*

707 We estimated standard population parameters  $\pi$ , Tajima's D, Fu and Li's D, and Fu's F  
708 using the R packages PopGenome 2.6.0 (Pfeifer et al. 2014). Values of  $F_{st}$  were estimated  
709 with StAMPP 1.5.1 (Pembleton et al. 2013) to obtain 95% confidence intervals by performing

710 5,000 bootstraps. Populations were designated as PB-1, PB-2, PB-3, or by sampling into  
711 each geographical location from the same lineage (for example, only PB-1s were compared  
712 between localities).

713 The variants of the mosaic *S. eubayanus* strains were split to bins of 100 SNPs (on average  
714 ~5kb windows) and each bin was assigned to either of the populations (i.e. PB-1, PB-2, PB-  
715 3, or PA) using adegenet's `hyb.pred` function. This algorithm uses DAPC to estimate  
716 membership probability of a hybrid dataset to a known cluster (populations). The Argentinian  
717 strains yHCT104 and yHCT72 were used as PA representative members.

718 The R package `hierfstat` (Goudet 2005) was used to calculate  $F_{IS}$ ,  $H_s$ , and  $H_o$  by using the  
719 `basic.stats` function. Bootstrapping per loci on each population's  $F_{IS}$  was done using  
720 `hierfstat`'s `boot.ppfis`, obtaining the 50th and 97.5th quantiles after 50000 bootstraps. To  
721 perform a Mantel test, first the Nei's genetic distances between subpopulations (considering  
722 localities) was calculated with the R package `StAMPP` (Pembleton et al. 2013). Euclidean  
723 distance between localities was calculated using latitude and distances coordinates with R  
724 '`dist`' function. Randel test was performed using the `ade4` R package (Dray and Dufour  
725 2007).

## 726 *Pangenome*

727 Isolates were assembled with assembled with Spades using  $k$  from 21 to 67. To detect the  
728 non-reference material we used the custom pipeline based on the method described in  
729 (Peter et al. 2018). LRSDAY software (Yue and Liti) was used to annotate the non-reference  
730 material. The newly annotated ORFs have been added to the reference ORFs and a custom  
731 pipeline, also based on methods from (Peter et al.) was used to collapse ORFs with identity  
732 percentage over 95, selecting an unique reference for each groups of allelic variants to  
733 obtain a list of non-redundant pangenomic ORF sequences. Confirmation of presence of



734 these ORFs has been obtained by mapping the reads of each strain to the set of pangenomic  
735 ORFs using BWA mem with the option – U 0. Filtering was performed with samtools with  
736 options –bSq 20 –F260.

#### 737 *Strains Phenotyping and Fermentations*

738 The microcultivation phenotyping assay of the *S. eubayanus* strains was performed as  
739 previously described (Kessi-Perez et al. 2016). Briefly, isolates were pre-cultivated in 200  
740 µL of YNB medium supplemented with glucose 2% for 48h at 25°C. For the experimental  
741 assay, strains were inoculated to an optical density (OD) of 0.03–0.1 (wavelength 630 nm)  
742 in 200 uL of media and incubated without agitation at 25°C for 24 h (YNB control) and 48 h  
743 for other conditions in a Tecan Sunrise absorbance microplate reader. OD was measured  
744 every 20 minutes using a 630 nm filter. Each experiment was performed in quadruplicate.  
745 Maximum growth rate, lag time and OD max for each strain were calculated using  
746 GrowthRates software with default parameters (Hall et al. 2014).

#### 747 *Fermentation in beer wort and HPLC analysis*

748 Fermentations were conducted using a 12°P high-gravity wort at 12°C in 50 mL (micro-  
749 fermentations). The 12 °P wort was prepared from a Munton's Connoisseurs Pilsner Lager  
750 kit (Muntons plc, England). The worts were oxygenated to 15 mg/L prior to pitching. For the  
751 micro-fermentations, the strains were initially grown with constant agitation in 5 mL of wort  
752 for 48 hours at 15°C. Following this, 50 mL of fresh wort were inoculated to a final  
753 concentration of  $15 \times 10^6$  viable cells/mL and fermentations were maintained for seven days.  
754 Fermentations were weighed every day to calculate the CO<sub>2</sub> output. The fermentations were  
755 maintained until no-CO<sub>2</sub> lost was observed. At the end of the fermentation, the fermented  
756 worts were centrifuged at 9,000xg for 10 min and the supernatant was collected. From this,  
757 the concentration of extracellular metabolites was determined using HPLC. Specifically, 20

758  $\mu$ L of filtered wort were injected in a Shimadzu Prominence HPLC (Shimadzu, USA) with a  
759 Bio-Rad HPX –87H column (Nissen et al., 1997). In this way, the concentrations of glucose,  
760 fructose, maltose, maltotriose, ethanol, and glycerol were estimated.

#### 761 *Data Analysis*

762 Multiple comparisons across localities were performed utilising a non-parametric Kruskal-  
763 Wallis test and Dunn's Multiple Test Comparison. Genomewide *F<sub>s</sub>* and *F<sub>st</sub>* data across  
764 lineages was compared using paired Student t-test. Spearman rank correlation test and  
765 Pearson test were performed to determine correlations between variables. Finally, all  
766 analyses were performed utilising GraphPad Prism Software 5.2, except for correlation  
767 analysis which were performed in R (Development Core Team). In all cases *p*-values < 0.05  
768 were considered as significant.

#### 769 **ACKNOWLEDGMENTS**

770 We would like to thank Valentina Abarca, Wladimir Mardones and Antonio Molina for  
771 technical help and Yessica Pérez, Antonia Nespolo, Natalia Hassan and Verónica Briceño  
772 for helping us in the sampling field trips recognising *Nothofagus* trees. We also thank Gilles  
773 Fischer for constructive feedback on the data analysis and the manuscript. We thank  
774 CONAF and WCS Chile for allowing us sampling yeasts across the country. This research  
775 was supported to FC by Comisión Nacional de Investigación Científica y Tecnológica  
776 CONICYT FONDECYT [1180161] and Millennium Institute for Integrative Biology (iBio). CV  
777 is supported by CONICYT FONDECYT [grant 3170404]. RN is supported by FIC  
778 'Transferencia Levaduras Nativas para Cerveza Artesanal' and Fondecyt grant 1180917.  
779 K.U. was funded by USA 1899 – VRIDEI 021943CR-PAP Universidad de Santiago de Chile.  
780 Finally, we thank Ginkgobioworks for generating the sequence data.

781 *Authors Contributions:* R.N. and F.C designed the study. R.N, F.C, C.V., C.O., S.T. collected  
782 and genotyped the strains. D.T. and E.M. performed the DNA sequencing. C.V, R.N., P.S.  
783 and F.C analysed the data. M.D.C., S.M. and G.L. performed the pangenome and FACS  
784 analysis. C.O., S.T., K.U., F.V. performed the experiments. R.N. and F.C wrote the  
785 manuscript.

## 786 **COMPETING INTERESTS**

787 The authors declare no competing interests.

## 788 **REFERENCES**

- 789 Almeida P, Goncalves C, Teixeira S, Libkind D, Bontrager M, Masneuf-Pomarede I, Albertin W,  
790 Durrens P, Sherman DJ, Marullo P et al. 2014. A Gondwanan imprint on global diversity and  
791 domestication of wine and cider yeast *Saccharomyces uvarum*. *Nat Commun* **5**: 4044.
- 792 Alves SL, Jr., Herberts RA, Hollatz C, Trichez D, Miletti LC, de Araujo PS, Stambuk BU. 2008. Molecular  
793 analysis of maltotriose active transport and fermentation by *Saccharomyces cerevisiae*  
794 reveals a determinant role for the AGT1 permease. *Appl Environ Microbiol* **74**: 1494-1501.
- 795 Andrews S. 2014. *FastQC A Quality Control tool for High Throughput Sequence Data*.
- 796 Baker E, Wang B, Bellora N, Peris D, Hulfachor AB, Koshalek JA, Adams M, Libkind D, Hittinger CT.  
797 2015. The Genome Sequence of *Saccharomyces eubayanus* and the Domestication of Lager-  
798 Brewing Yeasts. *Mol Biol Evol* **32**: 2818-2831.
- 799 Baker EP, Hittinger CT. 2019. Evolution of a novel chimeric maltotriose transporter in *Saccharomyces*  
800 *eubayanus* from parent proteins unable to perform this function. *Plos Genetics* **15**.
- 801 Baker EP, Peris D, Moriarty RV, Li XC, Fay JC, Hittinger CT. 2019. Mitochondrial DNA and temperature  
802 tolerance in lager yeasts. *Sci Adv* **5**: eaav1869.
- 803 Bing J, Han PJ, Liu WQ, Wang QM, Bai FY. 2014. Evidence for a Far East Asian origin of lager beer  
804 yeast. *Curr Biol* **24**: R380-381.
- 805 Borneman AR, Pretorius IS. 2015. Genomic insights into the *Saccharomyces sensu stricto* complex.  
806 *Genetics* **199**: 281-291.
- 807 Brickwedde A, Brouwers N, van den Broek M, Gallego Murillo JS, Fraiture JL, Pronk JT, Daran JG.  
808 2018. Structural, Physiological and Regulatory Analysis of Maltose Transporter Genes in  
809 *Saccharomyces eubayanus* CBS 12357(T). *Front Microbiol* **9**: 1786.
- 810 Cingolani P, Platts A, Wang le L, Coon M, Nguyen T, Wang L, Land SJ, Lu X, Ruden DM. 2012. A  
811 program for annotating and predicting the effects of single nucleotide polymorphisms,  
812 SnpEff: SNPs in the genome of *Drosophila melanogaster* strain w1118; iso-2; iso-3. *Fly* **6**: 80-  
813 92.
- 814 Cubillos FA, Gibson B, Grijalva-Vallejos N, Krogerus K, Nikulin J. 2019. Bioprospecting for brewers:  
815 Exploiting natural diversity for naturally diverse beers. *Yeast* doi:10.1002/yea.3380.
- 816 Chen S, Zhou Y, Chen Y, Gu J. 2018. fastp: an ultra-fast all-in-one FASTQ preprocessor. *Bioinformatics*  
817 **34**: i884-i890.

- 818 Danecek P, Auton A, Abecasis G, Albers CA, Banks E, DePristo MA, Handsaker RE, Lunter G, Marth  
819 GT, Sherry ST et al. 2011. The variant call format and VCFtools. *Bioinformatics* **27**: 2156-  
820 2158.
- 821 Dashko S, Zhou N, Compagno C, Piskur J. 2014. Why, when, and how did yeast evolve alcoholic  
822 fermentation? *FEMS Yeast Res* **14**: 826-832.
- 823 de Porras ME, Maldonado A, Abarzua AM, Cardenas ML, Francois JP, Martel-Cea A, Stern CR,  
824 Mendez C, Reyes O. 2012. Postglacial vegetation, fire and climate dynamics at Central  
825 Chilean Patagonia (Lake Shaman, 44 degrees S). *Quaternary Sci Rev* **50**: 71-85.
- 826 DePristo MA, Banks E, Poplin R, Garimella KV, Maguire JR, Hartl C, Philippakis AA, del Angel G, Rivas  
827 MA, Hanna M et al. 2011. A framework for variation discovery and genotyping using next-  
828 generation DNA sequencing data. *Nat Genet* **43**: 491-498.
- 829 Development Core Team R. 2008. R Core Team. R A Language and Environment for Statistical  
830 Computing 2014.
- 831 Dhar R, Sagesser R, Weikert C, Wagner A. 2013. Yeast Adapts to a Changing Stressful Environment  
832 by Evolving Cross-Protection and Anticipatory Gene Regulation. *Molecular Biology and*  
833 *Evolution* **30**: 573-588.
- 834 Dray S, Dufour A-B. 2007. The ade4 Package: Implementing the Duality Diagram for Ecologists. *2007*  
835 **22**: 20.
- 836 Dujon BA, Louis EJ. 2017. Genome Diversity and Evolution in the Budding Yeasts  
837 (*Saccharomycotina*). *Genetics* **206**: 717-750.
- 838 Dutra TL, Batten DJ. 2000. Upper Cretaceous floras of King George Island, West Antarctica, and their  
839 palaeoenvironmental and phytogeographic implications. *Cretaceous Research* **21**: 181-209.
- 840 Eizaguirre JI, Peris D, Rodriguez ME, Lopes CA, De Los Rios P, Hittinger CT, Libkind D. 2018.  
841 Phylogeography of the wild Lager-brewing ancestor (*Saccharomyces eubayanus*) in  
842 Patagonia. *Environ Microbiol* doi:10.1111/1462-2920.14375.
- 843 Evanno G, Regnaut S, Goudet J. 2005. Detecting the number of clusters of individuals using the  
844 software STRUCTURE: a simulation study. *Mol Ecol* **14**: 2611-2620.
- 845 Gallone B, Steensels J, Prahl T, Soriaga L, Saels V, Herrera-Malaver B, Merlevede A, Roncoroni M,  
846 Voordeckers K, Miraglia L et al. 2016. Domestication and Divergence of *Saccharomyces*  
847 *cerevisiae* Beer Yeasts. *Cell* **166**: 1397-1410 e1316.
- 848 García-Alcalde F, Okonechnikov K, Carbonell J, Cruz LM, Götz S, Tarazona S, Dopazo J, Meyer TF,  
849 Conesa A. 2012. Qualimap: evaluating next-generation sequencing alignment data.  
850 *Bioinformatics* **28**: 2678-2679.
- 851 Gayevskiy V, Goddard MR. 2016. *Saccharomyces eubayanus* and *Saccharomyces arboricola* reside  
852 in North Island native New Zealand forests. *Environ Microbiol* **18**: 1137-1147.
- 853 Goncalves M, Pontes A, Almeida P, Barbosa R, Serra M, Libkind D, Hutzler M, Goncalves P, Sampaio  
854 JP. 2016. Distinct Domestication Trajectories in Top-Fermenting Beer Yeasts and Wine  
855 Yeasts. *Curr Biol* **26**: 2750-2761.
- 856 Goudet J. 2005. hierfstat, a package for r to compute and test hierarchical F-statistics. *Molecular*  
857 *Ecology Notes* **5**: 184-186.
- 858 Guz SS. 2011. The Yeasts: A Taxonomic Study, 5th edition. *Libr J* **136**: 108-108.
- 859 Hagman A, Sall T, Compagno C, Piskur J. 2013. Yeast "make-accumulate-consume" life strategy  
860 evolved as a multi-step process that predates the whole genome duplication. *PLoS One* **8**:  
861 e68734.
- 862 Hahne F, LeMeur N, Brinkman RR, Ellis B, Haaland P, Sarkar D, Spidlen J, Strain E, Gentleman R. 2009.  
863 flowCore: a Bioconductor package for high throughput flow cytometry. *BMC Bioinformatics*  
864 **10**: 106.
- 865 Hall BG, Acar H, Nandipati A, Barlow M. 2014. Growth rates made easy. *Mol Biol Evol* **31**: 232-238.

- 866 Hebly M, Brickwedde A, Bolat I, Driessen MR, de Hulster EA, van den Broek M, Pronk JT, Geertman  
867 JM, Daran JM, Daran-Lapujade P. 2015. *S. cerevisiae* x *S. eubayanus* interspecific hybrid, the  
868 best of both worlds and beyond. *FEMS Yeast Res* **15**.
- 869 Hershkovitz P. 1999. *Dromiciops gliroides* Thomas, 1894, Last of the Microbiotheria (Marsupialia),  
870 with a review of the family Microbiotheridae. *Fieldiana* **93**: 1-60.
- 871 Hildebrand-Vogel R, Godoy R, Vogel A. 1990. Subantarctic-Andean *Nothofagus pumilio* Forests:  
872 Distribution Area and Synsystematic Overview; Vegetation and Soils as Demonstrated by an  
873 Example of a South Chilean Stand. *Vegetatio* **89**: 55-68.
- 874 Hill RS. 1992a. NOTHOFAGUS - EVOLUTION FROM A SOUTHERN PERSPECTIVE. *Trends in Ecology &*  
875 *Evolution* **7**: 190-194.
- 876 Hill RS. 1992b. *Nothofagus*: Evolution from a southern perspective. *Trends Ecol Evol* **7**: 190-194.
- 877 Hill WG, Weir BS. 1988. Variances and covariances of squared linkage disequilibria in finite  
878 populations. *Theor Popul Biol* **33**: 54-78.
- 879 Hinojosa LF, Gaxiola A, Perez MF, Carvajal F, Campano MF, Quattrocchio M, Nishida H, Uemura K,  
880 Yabe A, Bustamante R et al. 2016a. Non-congruent fossil and phylogenetic evidence on the  
881 evolution of climatic niche in the Gondwana genus *Nothofagus*. *Journal of Biogeography* **43**:  
882 555-567.
- 883 Hinojosa LF, Gaxiola A, Pérez MF, Carvajal F, Campano MF, Quattrocchio M, Nishida H, Uemura K,  
884 Yabe A, Bustamante R et al. 2016b. Non-congruent fossil and phylogenetic evidence on the  
885 evolution of climatic niche in the Gondwana genus *Nothofagus*. *Journal of Biogeography* **43**:  
886 555-567.
- 887 Hoban S, Kelley JL, Lotterhos KE, Antolin MF, Bradburd G, Lowry DB, Poss ML, Reed LK, Storfer A,  
888 Whitlock MC. 2016. Finding the Genomic Basis of Local Adaptation: Pitfalls, Practical  
889 Solutions, and Future Directions. *Am Nat* **188**: 379-397.
- 890 Horton BK. 2018. Sedimentary record of Andean mountain building. *Earth-Science Reviews* **178**: 279-  
891 309.
- 892 J White T, Bruns T, Lee S, Taylor J, A Innis M, H Gelfand D, Sninsky J. 1990. Amplification and Direct  
893 Sequencing of Fungal Ribosomal RNA Genes for Phylogenetics. Vol 31, pp. 315-322.
- 894 Jombart T. 2008. adegenet: a R package for the multivariate analysis of genetic markers.  
895 *Bioinformatics* **24**: 1403-1405.
- 896 Kamvar ZN, Tabima JF, Grunwald NJ. 2014. Poppr: an R package for genetic analysis of populations  
897 with clonal, partially clonal, and/or sexual reproduction. *PeerJ* **2**: e281.
- 898 Kessi-Perez EI, Araos S, Garcia V, Salinas F, Abarca V, Larrondo LF, Martinez C, Cubillos FA. 2016.  
899 RIM15 antagonistic pleiotropy is responsible for differences in fermentation and stress  
900 response kinetics in budding yeast. *FEMS Yeast Res* doi:10.1093/femsyr/fow021.
- 901 Knaus BJ, Grunwald NJ. 2017. vcfr: a package to manipulate and visualize variant call format data in  
902 R. *Mol Ecol Resour* **17**: 44-53.
- 903 Kopelman NM, Mayzel J, Jakobsson M, Rosenberg NA, Mayrose I. 2015. Clumpak: a program for  
904 identifying clustering modes and packaging population structure inferences across K. *Mol*  
905 *Ecol Resour* **15**: 1179-1191.
- 906 Krogerus K, Magalhaes F, Vidgren V, Gibson B. 2015. New lager yeast strains generated by  
907 interspecific hybridization. *J Ind Microbiol Biotechnol* **42**: 769-778.
- 908 Krogerus K, Magalhaes F, Vidgren V, Gibson B. 2017. Novel brewing yeast hybrids: creation and  
909 application. *Appl Microbiol Biotechnol* **101**: 65-78.
- 910 Langdon QK, Peris D, Eizaguirre JI, Oplente DA, Buh KV, Sylvester K, Jarzyna M, Rodríguez ME, Lopes  
911 CA, Libkind D et al. 2019. Genomic diversity and global distribution of *Saccharomyces*  
912 *eubayanus*, the wild ancestor of hybrid lager-brewing yeasts. *Submitted*.

- 913 Legras JL, Galeote V, Bigey F, Camarasa C, Marsit S, Nidelet T, Sanchez I, Couloux A, Guy J, Franco-  
914 Duarte R et al. 2018. Adaptation of *S. cerevisiae* to Fermented Food Environments Reveals  
915 Remarkable Genome Plasticity and the Footprints of Domestication. *Mol Biol Evol* **35**: 1712-  
916 1727.
- 917 Li H. 2013. *Aligning sequence reads, clone sequences and assembly contigs with BWA-MEM*.
- 918 Li H, Handsaker B, Wysoker A, Fennell T, Ruan J, Homer N, Marth G, Abecasis G, Durbin R, Genome  
919 Project Data Processing S. 2009. The Sequence Alignment/Map format and SAMtools.  
920 *Bioinformatics* **25**: 2078-2079.
- 921 Li YL, Liu JX. 2018. StructureSelector: A web-based software to select and visualize the optimal  
922 number of clusters using multiple methods. *Mol Ecol Resour* **18**: 176-177.
- 923 Libkind D, Hittinger CT, Valerio E, Goncalves C, Dover J, Johnston M, Goncalves P, Sampaio JP. 2011.  
924 Microbe domestication and the identification of the wild genetic stock of lager-brewing  
925 yeast. *Proc Natl Acad Sci U S A* **108**: 14539-14544.
- 926 Liti G, Carter DM, Moses AM, Warringer J, Parts L, James SA, Davey RP, Roberts IN, Burt A,  
927 Koufopanou V et al. 2009. Population genomics of domestic and wild yeasts. *Nature* **458**:  
928 337-341.
- 929 Nakao Y, Kanamori T, Itoh T, Kodama Y, Rainieri S, Nakamura N, Shimonaga T, Hattori M, Ashikari T.  
930 2009. Genome sequence of the lager brewing yeast, an interspecies hybrid. *DNA Res* **16**:  
931 115-129.
- 932 Parts L, Cubillos FA, Warringer J, Jain K, Salinas F, Bumpstead SJ, Molin M, Zia A, Simpson JT, Quail  
933 MA et al. 2011. Revealing the genetic structure of a trait by sequencing a population under  
934 selection. *Genome Res* **21**: 1131-1138.
- 935 Pembleton LW, Cogan NO, Forster JW. 2013. StAMPP: an R package for calculation of genetic  
936 differentiation and structure of mixed-ploidy level populations. *Mol Ecol Resour* **13**: 946-  
937 952.
- 938 Peris D, Langdon QK, Moriarty RV, Sylvester K, Bontrager M, Charron G, Leducq JB, Landry CR,  
939 Libkind D, Hittinger CT. 2016. Complex Ancestries of Lager-Brewing Hybrids Were Shaped  
940 by Standing Variation in the Wild Yeast *Saccharomyces eubayanus*. *PLoS Genet* **12**:  
941 e1006155.
- 942 Peris D, Sylvester K, Libkind D, Goncalves P, Sampaio JP, Alexander WG, Hittinger CT. 2014.  
943 Population structure and reticulate evolution of *Saccharomyces eubayanus* and its lager-  
944 brewing hybrids. *Mol Ecol* **23**: 2031-2045.
- 945 Peter J, De Chiara M, Friedrich A, Yue JX, Pflieger D, Bergstrom A, Sigwalt A, Barre B, Llored  
946 A et al. 2018. Genome evolution across 1,011 *Saccharomyces cerevisiae* isolates. *Nature*  
947 **556**: 339-344.
- 948 Pfeifer B, Wittelsburger U, Ramos-Onsins SE, Lercher MJ. 2014. PopGenome: an efficient Swiss army  
949 knife for population genomic analyses in R. *Mol Biol Evol* **31**: 1929-1936.
- 950 Pham T, Wimalasena T, Box WG, Koivuranta K, Storgards E, Smart KA, Gibson BR. 2011. Evaluation  
951 of ITS PCR and RFLP for Differentiation and Identification of Brewing Yeast and Brewery  
952 'Wild' Yeast Contaminants. *J I Brewing* **117**: 556-568.
- 953 Piskur J, Rozpedowska E, Polakova S, Merico A, Compagno C. 2006. How did *Saccharomyces* evolve  
954 to become a good brewer? *Trends Genet* **22**: 183-186.
- 955 Ponce JF, Fernández M. 2014. Climatic and Environmental History of Isla de los Estados, Argentina.  
956 doi:10.1007/978-94-007-4363-2. Springer Netherlands.
- 957 Ramasamy RK, Ramasamy S, Bindroo BB, Naik VG. 2014. STRUCTURE PLOT: a program for drawing  
958 elegant STRUCTURE bar plots in user friendly interface. *SpringerPlus* **3**: 431.

- 959 Sampaio JP, Goncalves P. 2008. Natural populations of *Saccharomyces kudriavzevii* in Portugal are  
960 associated with oak bark and are sympatric with *S. cerevisiae* and *S. paradoxus*. *Appl Environ*  
961 *Microbiol* **74**: 2144-2152.
- 962 Sarkar D, Le Meur N, Gentleman R. 2008. Using flowViz to visualize flow cytometry data.  
963 *Bioinformatics* **24**: 878-879.
- 964 Scannell DR, Zill OA, Rokas A, Payen C, Dunham MJ, Eisen MB, Rine J, Johnston M, Hittinger CT. 2011.  
965 The Awesome Power of Yeast Evolutionary Genetics: New Genome Sequences and Strain  
966 Resources for the *Saccharomyces sensu stricto* Genus. *G3 (Bethesda)* **1**: 11-25.
- 967 Schacherer J, Shapiro JA, Ruderfer DM, Kruglyak L. 2009. Comprehensive polymorphism survey  
968 elucidates population structure of *Saccharomyces cerevisiae*. *Nature* **458**: 342-345.
- 969 Sersic AN, Cosacov A, Cocucci AA, Johnson LA, Pozner R, Avila LJ, Sites JW, Morando M. 2011.  
970 Emerging phylogeographical patterns of plants and terrestrial vertebrates from Patagonia.  
971 *Biological Journal of the Linnean Society* **103**: 475-494.
- 972 Steinmetz LM, Sinha H, Richards DR, Spiegelman JJ, Oefner PJ, McCusker JH, Davis RW. 2002.  
973 Dissecting the architecture of a quantitative trait locus in yeast. *Nature* **416**: 326-330.
- 974 Van der Auwera GA, Carneiro MO, Hartl C, Poplin R, Del Angel G, Levy-Moonshine A, Jordan T, Shakir  
975 K, Roazen D, Thibault J et al. 2013. From FastQ data to high confidence variant calls: the  
976 Genome Analysis Toolkit best practices pipeline. *Current protocols in bioinformatics* **43**:  
977 11.10.11-33.
- 978 Wilkening S, Lin G, Fritsch ES, Tekkedil MM, Anders S, Kuehn R, Nguyen M, Aiyar RS, Proctor M,  
979 Sakhanenko NA et al. 2014. An evaluation of high-throughput approaches to QTL mapping  
980 in *Saccharomyces cerevisiae*. *Genetics* **196**: 853-865.
- 981 Yang Y, Foulquie-Moreno MR, Clement L, Erdei E, Tanghe A, Schaerlaekens K, Dumortier F, Thevelein  
982 JM. 2013. QTL analysis of high thermotolerance with superior and downgraded parental  
983 yeast strains reveals new minor QTLs and converges on novel causative alleles involved in  
984 RNA processing. *PLoS Genet* **9**: e1003693.
- 985 Yue JX, Li J, Aigrain L, Hallin J, Persson K, Oliver K, Bergstrom A, Coupland P, Warringer J, Lagomarsino  
986 MC et al. 2017. Contrasting evolutionary genome dynamics between domesticated and wild  
987 yeasts. *Nat Genet* doi:10.1038/ng.3847.
- 988 Yue JX, Liti G. 2018. Long-read sequencing data analysis for yeasts. *Nat Protoc* **13**: 1213-1231.

989

990

## 991 **FIGURE LEGENDS**

992 **Figure 1. Geographic distribution and isolation frequency of *S. eubayanus* strains. (A)**

993 Map of the world depicting the number of available *S. eubayanus* sequenced genomes from  
994 around the world (white circles), together with the ten localities in Chile where the 82 strains  
995 sequenced in this study were isolated. Overall, a 2,090 km distance between sites was  
996 covered. Frequency of bark samples that yielded a (B) successful yeast isolation (dark grey)

997 or no growth (light grey), a (C) *Saccharomyces* (dark grey) or other non-*Saccharomyces*  
998 genera (light grey), and a (D) *S. eubayanus* (dark grey) or *S. uvarum* (light grey) species.

999 **Figure 2. Phylogeny of *S. eubayanus*.** (A) Whole genome Neighbour-joining tree built  
1000 using 590,909 biallelic SNPs in 105 strains and manually rooted with *S. uvarum* as the  
1001 outgroup. In all cases, bootstrap support values were 100% for all lineages. Three PB  
1002 clades: PB-1 (red), PB-2 (green) and PB-3(yellow) and a single PA clade (blue) were  
1003 identified, together with admixed strains between the different lineages. Branch lengths  
1004 correspond to genetic distance. (B) Whole-genome Neighbour-joining tree of 105 strains  
1005 built as in (A) together with the population structure generated with STRUCTURE. An  
1006 optimum  $k = 5$  groups was obtained. The geographic origin of each strain in depicted as  
1007 follows: Canada (CA), United States (UN), China (CN), Lager (LG), AR (Argentina), New  
1008 Zeland (NZ), AL (Altos de Lircay), NB (Nahuelbuta), Villarrica (VI), Choshuenco (CO),  
1009 Puyehue (PY), Osorno Volcano (VO), Coyhaique (CY), Torres del Paine (TP), Magallanes  
1010 (MG) and Karukinka (KR). (C) Lineages distribution across sampling sites including PB  
1011 lineages and SoAm admixed lineages. (D) Linkage disequilibrium decay over distance (kb)  
1012 expressed in terms of correlation coefficient,  $r^2$ . LD decay for each window was estimated  
1013 as the pairwise average for all SNPs pairs separated by no more than 100 kb. The PB-1  
1014 lineage shows the lowest LD values compared to any other population in our collection (E).  
1015 Genome-wide ancestry for admixed strains. Bins of 100 SNPs were assigned in the admixed  
1016 strains to the populations PB-1 (red), PB-2 (green), PB-3 (yellow) or PA (blue) based on  
1017 sequence similarity.

1018 **Figure 3. Nucleotide diversity in *S. eubayanus* across populations and localities in**  
1019 **the western side of the Andes.** Nucleotide diversity ( $\pi$ ) in (A) PB populations obtained in  
1020 this study and (B) localities across Chile. The geographic origin of each strain in depicted as  
1021 follows: AL (Altos de Lircay), NB (Nahuelbuta), Villarrica (VI), Choshuenco (CO), Puyehue



1022 (PY), Osorno Volcano (VO), Coyhaique (CY), Torres del Paine (TP), Magallanes (MG) and  
1023 Karukinka (KR). (C) Correlation between nucleotide diversity and latitude.

1024 **Figure 4. PCA of the gene's presence-absence profiles.** (A) Principal component  
1025 analyses of the first three components show a reasonable level of concordance between  
1026 sequence variation and genome content difference. Chinese/North American branch can be  
1027 easily separated from the South American clades. Only non-mosaic 83 isolates from all  
1028 populations were considered. (B) Principal component analyses considering only PB  
1029 populations. Middle positioning of PB-1 mirrors the shape of the un-rooted phylogenetic tree  
1030 based on the sequence divergence (Fig.2A). Interestingly, the PB-3 is the most separated  
1031 clade, suggesting a lower level of outbreeding, while a partial overlap can be identified  
1032 between the other clades.

1033 **Figure 5. Phenotypic diversity in *S. eubayanus*.** Heat map depicting the phenotypic  
1034 diversity in *S. eubayanus* obtained from eight different conditions assessed in microcultures.  
1035 Strains are grouped by hierarchical clustering and names & colours indicate the clade. The  
1036 heat maps were elaborated based on z-scores within each phenotype.

1037 **Figure 6. Fermentative profile of *S. eubayanus* strains.** (A) CO<sub>2</sub> loss levels represent the  
1038 fermentative capacity of wild isolates obtained from microfermentations. Error bars denote  
1039 the standard deviation (B) Maltose consumption was directly correlated with CO<sub>2</sub> loss and  
1040 latitude of the origin of the isolate.

1041 **Figure S1. FACS analysis in *S. eubayanus* isolates.** (A) Fluorescence values for each  
1042 sample are shown in grey. (\*red): haploid CL609.1; (\*green): diploid CL1004.1; (\*blue):  
1043 tetraploid CL1005.1. (B) Number of cell vs propidium iodide intensity is shown. Haploid (n),  
1044 diploid (2n) and tetraploid (4n) examples are shown for the same strains as above (\*).

1045 **Figure S2. Results of STRUCTURE analysis for the different partition numbers (k = 3-**  
1046 **7).** k-values were estimated for different partition numbers, being k = 5 the highest score.

1047 **Figure S3. Principal Components Analysis using sequence similarity on SNP data.** A  
1048 PCA analysis was performed using 229,272 SNPs. Strains clustered separately in  
1049 agreement with the structure and phylogenetic analysis performed.

1050 **Figure S4. Tajima D' statistics of the PB-clades.** (A) Tajima D' values along the genome  
1051 for PB-1 (top), PB-2 (middle) and PB-3 (bottom) lineages. Tajima D' were estimated using  
1052 the R packages PopGenome 2.6.0. (B). Individual example of extremely low Tajima D'  
1053 values in Chromosome V for PB-1 and PB-2. The close-up denotes the genes located within  
1054 the low Tajima D' region suggesting a common genetic ancestry.

1055 **Figure S5. Population differentiation values between lineages( $F_{ST}$ ).**

1056 **Figure S6. Pairwise genetic distance between individuals versus geographic**  
1057 **distance.** Genetic distances were estimated using the Nei's distance method. Geographic  
1058 distances were estimated based on map coordinates in google maps  
1059 (<https://www.google.com/maps>). A positive correlation between genetic distance and  
1060 geographic distance was found.

1061 **Figure S7. Horizontal gene transfer event in PB-2 clade** (A) Nine ORFs have been  
1062 identified on a single contig in 9 isolates. Around 6 kb of the flanking regions of these ORFs  
1063 correspond to the chromosome I subtelomere, while the region where the ORFs are located  
1064 do not show any similarities with known regions. (B) In the aminoacidic sequence of the nine  
1065 ORFs, several domains can be identified or inferred by homologies.

1066 **Figure S8. Principal Component Analysis of growth rates obtained under eight**  
1067 **different conditions across isolates.**

1068 **Figure S9. Agt1p analysis in *S. eubayanus*. (A).** Phylogeny of the *AGT1* gene on Chilean  
1069 *S. eubayanus* strains. *AGT1\_V*, *AGT1\_XIII* and *AGT1\_XVI*. Unrooted Neighbour-joining tree  
1070 for the 82 Chilean strains and CBS12357/F1318. The trees were built using 29 SNPs and 6  
1071 INDELS for *AGT1\_V*, 52 SNPs and 5 INDELS for *AGT1\_XIII* and 6 SNPs and 2 INDELS for  
1072 *AGT1\_XVI*. (B). Modelling of the putative Agt1 structure in Chilean *S. eubayanus* strains.  
1073 Three dimensional structure of the Agt1 transporter codified by *AGT1\_V*, *AGT1\_XIII* and  
1074 *AGT1\_XVI* in rainbow colouration (blue to red) from the N-terminus to the C-terminus. The  
1075 truncated proteins consist of the first 50, 180 and 290 amino acids approximately for *AGT1\_V*,  
1076 *AGT1\_XIII* and *AGT1\_XVI* respectively. The truncated proteins are translated from the N-  
1077 terminus to a premature STOP codon generated by INDELS on the sequence of the *AGT1*  
1078 gene that codify the protein. (C) Binding affinity between the Agt1 transporter and maltose  
1079 or maltotriose. Comparison between the binding affinities of the non-truncated and truncated  
1080 Agt1 proteins with maltose. The binding affinities are predicted in Kcal/mol. Lower energy  
1081 binding affinity (Kcal/mol) implies a higher affinity of the protein for the ligand. The binding  
1082 affinity of all the truncated transporter are 32%, 14% and 7% lower than the non-truncated  
1083 form for Agt1\_V, Agt1\_XIII and Agt1\_XVI respectively (\*\* p-value < 0.001, \*\*\*\* p-value <  
1084 0.0001)

1085

1086 **Table S1. Number of samples obtained from each National Park.**

1087 **Table S2. Bioinformatics Summary statistics together with NCBI accession numbers.**

1088 **Table S3. Population genetics summary statistics for each clade & locality.**

1089 **Table S4. *Fst* values per lineages and localities.**

1090 **Table S5. Phenotype data for *S. eubayanus* strains.** (A). Raw phenotypic values. (B)

1091 Phenotype's correlations

1092 **Table S6. Phenotype comparison across localities.**

1093 **Table S7. Fermentation data for *S. eubayanus* strains.** (A) CO<sub>2</sub> lost in all strains. (B)

1094 Dunn's multiple comparisons test across localities.

1095 **Table S8. Physical Chemical parameters after wort fermentation.**
